# Supplementary material for: Life event stress and chronic obstructive pulmonary disease (COPD): associations with mental well-being and quality of life in a population-based study
Source: PubMed Central journal article supplement — BMJ Open. 2012 Nov 19;2(6):e001674. doi: 10.1136/bmjopen-2012-001674 (PMC3533009; doi:10.1136/bmjopen-2012-001674), 2012-11-19
Supplement: bmjopen-2012-001674.draft_revisions.pdf [file bmjopen-2012-001674.draft_revisions.pdf]

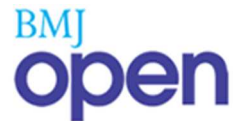

## Life Event Stress and Chronic Obstructive Pulmonary Disease (COPD): A Population-based Study

|                                                                                                                                                                                                                             |                                                                                                                                                                                                                                                                                                                                                                                                                                                                                                                                                                                                                                                                                                                       |
|-----------------------------------------------------------------------------------------------------------------------------------------------------------------------------------------------------------------------------|-----------------------------------------------------------------------------------------------------------------------------------------------------------------------------------------------------------------------------------------------------------------------------------------------------------------------------------------------------------------------------------------------------------------------------------------------------------------------------------------------------------------------------------------------------------------------------------------------------------------------------------------------------------------------------------------------------------------------|
| Journal:                                                                                                                                                                                                                    | <i>BMJ Open</i>                                                                                                                                                                                                                                                                                                                                                                                                                                                                                                                                                                                                                                                                                                       |
| Manuscript ID:                                                                                                                                                                                                              | bmjopen-2012-001674                                                                                                                                                                                                                                                                                                                                                                                                                                                                                                                                                                                                                                                                                                   |
| Article Type:                                                                                                                                                                                                               | Research                                                                                                                                                                                                                                                                                                                                                                                                                                                                                                                                                                                                                                                                                                              |
| Date Submitted by the Author:                                                                                                                                                                                               | 22-Jun-2012                                                                                                                                                                                                                                                                                                                                                                                                                                                                                                                                                                                                                                                                                                           |
| Complete List of Authors:                                                                                                                                                                                                   | Lu, Yanxia; National University of Singapore, Department of Psychological Medicine<br>Nyunt, Ma Shwe; National University Hospital System, Gerontological Research Programme<br>Gwee, Xinyi; National University of Singapore, Department of Psychological Medicine<br>Feng, Liang; National University Hospital System, Gerontological Research Programme<br>Feng, Lei; National University of Singapore, Department of Psychological Medicine<br>Kua, Ee Heok; National University of Singapore, Department of Psychological Medicine<br>Kumar, Rajeev; Australian National University Medical School, Academic unit of psychological medicine<br>Ng, Tze Pin; National University Hospital, Psychological Medicine |
| <b>Primary Subject Heading</b>:                                                                                                                                                                                             | Mental health                                                                                                                                                                                                                                                                                                                                                                                                                                                                                                                                                                                                                                                                                                         |
| Secondary Subject Heading:                                                                                                                                                                                                  | Epidemiology                                                                                                                                                                                                                                                                                                                                                                                                                                                                                                                                                                                                                                                                                                          |
| Keywords:                                                                                                                                                                                                                   | MENTAL HEALTH, PSYCHIATRY, RESPIRATORY MEDICINE (see Thoracic Medicine)                                                                                                                                                                                                                                                                                                                                                                                                                                                                                                                                                                                                                                               |
| <p>Note: The following files were submitted by the author for peer review, but cannot be converted to PDF. You must view these files (e.g. movies) online.</p> <p>STROBE_checklist_BMJ-Open_cross-sectional-studies.doc</p> |                                                                                                                                                                                                                                                                                                                                                                                                                                                                                                                                                                                                                                                                                                                       |

SCHOLARONE™  
Manuscripts

1  
2  
3  
4 **Life Event Stress and Chronic Obstructive Pulmonary Disease (COPD): A Population-**  
5 **based Study**  
6

7 Running title: Stress & COPD  
8  
9

10 Yanxia Lu<sup>1, 2</sup>, Ma Shwe Zin Nyunt<sup>1, 2</sup>, Gwee Xinyi, Liang Feng<sup>1, 2</sup>, Lei Feng<sup>1, 2</sup>, Ee Heok  
11 Kua<sup>1, 2</sup>, Rajeev Kumar<sup>3</sup>, Tze Pin Ng<sup>1, 2</sup>.  
12  
13

14  
15 <sup>1</sup> Gerontological Research Programme, Yong Loo Lin School of Medicine, National  
16 University of Singapore  
17

18 <sup>2</sup>Department of Psychological Medicine, National University Hospital System, Singapore  
19

20 <sup>3</sup>Academic unit of psychological medicine, Australian National University Medical School,  
21 Canberra, Australia  
22  
23

24 Author responsible for correspondence and request for reprints:  
25

26 A/P Tze-Pin Ng  
27

28 Gerontological Research Programme, National University of Singapore,  
29

30 Department of Psychological Medicine,  
31

32 NUHS Tower Block, 9<sup>th</sup> Floor, 1E Kent Ridge Road, Singapore 119228  
33

34 Fax: 65-67772191, Tel: 65-67723478 Email: [pcmngtp@nus.edu.sg](mailto:pcmngtp@nus.edu.sg)  
35  
36

37 The study was supported by a research grant (No. 03/1/21/17/214) from the Biomedical  
38 Research Council, Agency for Science, Technology and Research (ASTAR).  
39

40 Word count  
41

42 Text: 2446 words  
43

44 Abstract: 191 words  
45

46 Tables: 2  
47

48 Figure: 1  
49

50 **Key Words:** Life event stress; COPD; Cognitive function; Physical and psychological well-  
51 being; Quality of life  
52  
53  
54  
55  
56  
57  
58  
59  
60

## ARTICAL SUMMARY

### Article focus

- The relationship between life event stress and chronic obstructive pulmonary disease (COPD).
- The impact of life event stress on the cognitive, mental and physical functioning of individuals with COPD.

### Key messages

- Our findings showed that in individuals with COPD, life event stress unrelated to their illness experience had a worse effect in aggravating depressive symptoms and poor physical and mental functioning, more than in non-COPD individuals.

### Strengths and limitations of this study

- The case definition for COPD in this study was accurately based on symptom and post-bronchial dilatation spirometric measures of chronic airflow obstruction that are diagnostic of COPD according to GOLD recommended criteria.
- The results from this general population-based study are largely free of clinical selection bias, and also controlled for important confounding by demographic and psychosocial variables in the analysis.
- Definite causal inferences cannot be made from the cross-sectional findings in this study. Further longitudinal studies are required.

**Abstract**

**Objectives:** To study the relationship between life event stress and chronic obstructive pulmonary disease (COPD) and its impact on the mental and physical functioning of individuals with COPD, which are seldom investigated.

**Design:** Cross-sectional study.

**Participants:** A population-based sample (N=497) of individuals aged 65 and above with COPD (post-bronchodilatation  $FEV_1/FVC < 0.70$ , N=136) and without COPD (N=277).

**Outcome measures:** We measured stressful life events, depressive symptoms (GDS), cognitive symptoms and function (CFQ, MMSE), and functional status (SF36-PCS and SF36-MCS) in participants with and without COPD.

**Results:** In two-way analysis of variance, event stress was associated with significant main effects on worse GDS ( $p < 0.001$ ), SF36-PCS ( $p = 0.008$ ) and SF36-MCS scores ( $p < 0.001$ ), and with significant interaction effects in aggravating GDS score ( $p < 0.001$ ), SF36-PCS ( $p = 0.045$ ) and SF36-MCS ( $p = 0.034$ ) in participants with COPD more than in non-COPD participants, controlling for potential confounders. Main effect of COPD was found for  $FEV_1$  ( $p < 0.001$ ) and CFQ ( $p = 0.02$ ).

**Conclusions:** Life event stress was found to aggravate worse mental health and impaired functioning in individuals with COPD, much more than in those without COPD. Psychosocial stress factors should not be ignored in clinical practice when there's a relapse or flare-up of COPD symptoms.

## INTRODUCTION

Chronic obstructive pulmonary disease (COPD) stands out among chronic diseases with its high and rising prevalence and mortality [1], poor quality of life, frequent hospitalization and huge societal burden of care [2]. Because patients with COPD bear a heavy burden of psychological disturbances, psychiatric morbidity, and disability in daily living activities as well, the mental health of COPD patients has received growing attention in recent years.

Psychological factors are now recognized to play important roles in the etiology of chronic illness such as type II diabetes, coronary heart disease, gastroenterological disorders and obstetric outcomes [3]. The effects of chronic stress on the hypothalamic–pituitary–adrenal (HPA) axis and neuroendocrine profiles is known to result in depression, psychological burnout or post-traumatic stress disorder (PTSD) in all ages, but in late life, as well, there is growing evidence that it may also result in cognitive disorders ranging from mild cognitive impairment (MCI) to Alzheimer's disease [4]. Studies [5-7] have reported that psychological factors, such as anxiety and depressive symptoms, are common in COPD patients and are better predictors of COPD-related quality of life than pulmonary function.

Chronic stress in COPD patients include their illness experience of various difficulties in their emotional functioning, sleep and rest, physical mobility, social interaction, activities of daily living, recreation, work and finance. An extensive literature has described the stress and anxiety provoked by breathing difficulties/dyspnea in COPD, [8, 9] including muddled thoughts, heightened emotions, extreme fear and panic and decreased physical energy.

1  
2  
3 The relationship between life event stress (extrinsic to illness-related experience)  
4 and COPD and the impact of stress on the mental and physical health and functioning  
5 of individuals with COPD has rarely been investigated [10, 11]. Life event stress relate  
6 to both the occurrence of negative life events and the appraisal and perception of the  
7 stressfulness of the event by the individual. Individuals with COPD may differ  
8 considerably from their non-COPD counterparts with respect to their psychological  
9 reaction to life situations they perceive as stressful, including the ways in which they  
10 deal with the various demands posed by their respective chronic illness. Thus stress  
11 cognition has a direct effect on mental health in patients with COPD [12]. Andenæs et  
12 al. (2006) [13] found that there is a continual interplay between subjective appraisals of  
13 stressful events and outcomes including psychological disturbances among COPD  
14 patients. The limited number of studies investigating the relationship between  
15 subjective stress and COPD thus warrants much further investigation [14].  
16  
17  
18  
19  
20  
21  
22  
23  
24  
25  
26  
27  
28  
29  
30  
31  
32

33 The present study aimed to investigate the impact of life event stress on mental  
34 and physical health and functioning in a population-based sample (Singapore  
35 Longitudinal Aging Study) with and without COPD [15]. We hypothesized that in  
36 individuals with COPD, life event stress unrelated to their illness experience had a worse  
37 effect in aggravating depressive symptoms and physical and mental impairment than in  
38 non-COPD individuals. This was done by investigating the main effects of life event  
39 stress as well as the interaction between perceived life event stress and COPD in  
40 relation to depressive symptoms and SF-36 measures of mental and physical  
41 functioning.  
42  
43  
44  
45  
46  
47  
48  
49  
50  
51  
52  
53  
54

## 55 **METHODS**

### 56 **Study Design and Participants**

1  
2  
3 The participants in the study were an area subsample ( $n=497$ ) from the Singapore  
4 Longitudinal Aging Study (SLAS-2), a prospective population-based cohort study of  
5 aging and health of community-dwelling elderly [16]. A whole population of all older  
6 adults aged 65 or older, who were residents in one district were identified from door-to-  
7 door census, and invited to participate in the study. Residents who were mentally or  
8 physically unable to give informed consent or participate were excluded. The response  
9 rate was 78.5%. All participants signed written informed consent for the study which  
10 was approved by the National University of Singapore Institutional Review Board.  
11  
12  
13  
14  
15  
16  
17  
18  
19  
20  
21

## 22 COPD

23  
24 We identified cases of COPD among the participants who had characteristic  
25 symptoms of COPD and spirometric evidence of chronic airflow obstruction (post-  
26 bronchial dilatation  $FEV_1/FVC < 0.70$ ), in accordance with the definition recommended  
27 by the Global Initiative for Chronic Obstructive Lung Disease (GOLD) [17].  
28  
29  
30  
31  
32  
33  
34  
35

36 Ventilatory function testing was performed using a portable, battery operated,  
37 ultrasound transit-time based spirometer (Easy-One; Model 2001 Diagnostic Spirometer,  
38 NDD Medical Technologies, Zurich, Switzerland). Calibration was checked daily with a 3-  
39 L syringe. Forced expiratory maneuvers were performed with the respondent seated  
40 with recommended guidelines and standardization of procedures: at least three  
41 acceptable maneuvers, with forced vital capacity (FVC) and forced expiratory volume in  
42 the first second ( $FEV_1$ ) reproducible within 200 ml. Chronic airflow obstruction after  
43 bronchial dilatation was defined as  $FEV_1/FVC < 0.70$ .  
44  
45  
46  
47  
48  
49  
50  
51  
52  
53  
54

55 Questions from the British Medical Research Council Questionnaire on chronic  
56 respiratory symptoms were used to elicit symptoms characteristic of COPD: chronic  
57  
58  
59  
60

1  
2  
3 cough and/or sputum lasting at least 3 months in the year and/or breathlessness on  
4  
5 exertion.  
6  
7  
8

### 9 **Life Event Stress**

10  
11 Stressful life events and self-ratings of stress were measured by an 11-item life  
12 events inventory [18, 19] that excluded personal illness experiences directly related to  
13 COPD. The participants were asked to indicate yes or no as to whether any of eleven life  
14 events had occurred over the past year: spouse or partner die, a close friend or family  
15 member die or have a serious illness (other than your spouse or partner), major  
16 problems with money, a divorce or breakup, family member or close friend have a  
17 divorce or breakup, major conflict with children or grandchildren, major accidents,  
18 disasters, muggings, unwanted sexual experiences, robberies, or similar events, a family  
19 member or close friend lose their job or retire, physically abused, verbally abused, or pet  
20 die". If the participant indicated a life event(s) had occurred, he/she was asked to  
21 appraise the event and indicate on a scale of 1 (did not upset me) to 3 (upset me  
22 greatly) the extent it upset them. Participants who did not report the occurrence of any  
23 life event or who indicated they were not affected by the event were grouped together  
24 as the "no/low stress experience" group. The scale provides a life event perceived stress  
25 score that ranged from 0 to 33 with a higher score indicating a participant experienced  
26 a greater number of more stressful events.  
27  
28  
29  
30  
31  
32  
33  
34  
35  
36  
37  
38  
39  
40  
41  
42  
43  
44  
45  
46  
47  
48

### 49 **Depressive Symptoms**

50  
51 The presence of depressive symptoms was determined by the 15-item Geriatric  
52 Depression Scale (GDS-15) [20] validated for use in the local population [21]. The GDS  
53 was well suited for the study because it is largely free of the measurement artefact due  
54 to overlapping somatic symptoms of physical illness(es) and depression. Scores range  
55  
56  
57  
58  
59  
60



1  
2  
3 from 0 to 15, and scores of 5 or more are indicative of depression.  
4  
5  
6

### 7 **Cognitive Function**

9 Cognitive function was measured using the Cognitive Failures Questionnaire (CFQ)  
10 [22] and the Mini-Mental State Examination (MMSE) which are validated and widely  
11 used instrument to assess global cognitive functioning [23]. The CFQ uses a 5-point  
12 Likert-type scale (1 = Never, 5 = Very often) to evaluate self-reported cognitive problems  
13 (e.g., "Do you need to re-read instructions several times?"). Higher CFQ scores indicate  
14 more frequent cognitive problems and higher MMSE scores (0 to 30) indicate better  
15 global cognitive functioning.  
16  
17  
18  
19  
20  
21  
22  
23  
24

### 25 **Physical and Mental Functioning**

26  
27 Physical and mental functional well-being was measured by the Medical Outcomes  
28 Study 36-item Short Form (SF-36) [24] which has been previously validated for use in  
29 Singaporeans [25]. Weighted summary measures of Physical Health Component  
30 Summary (PCS) scores and Mental Health Component Summary (MCS) scores were  
31 computed with higher scores indicating better physical and mental health functioning  
32 and quality of life.  
33  
34  
35  
36  
37  
38  
39  
40  
41  
42  
43  
44

### 45 **Statistical Analysis**

46 Data analysis was performed using the software package PASW Statistics version  
47 18. The relationship between life event stress and depressive symptoms, cognitive  
48 function, physical and mental functioning was examined using two-way analysis of  
49 variance, with statistical significance set at  $p < 0.05$ . The individual main effects of life  
50 event stress and COPD and their interaction on depressive symptoms, cognitive function,  
51 physical and mental functioning were investigated for participants with and without  
52  
53  
54  
55  
56  
57  
58  
59  
60

1  
2  
3 COPD, adjusting for important confounding variables including sex, age, ethnicity,  
4 smoking status, and number of chronic illness. For the outcome variables with  
5 significant interaction of life event stress and COPD, the simple effects of their  
6 relationships with life event stress score were investigated respectively in participants  
7 with and without COPD.  
8  
9  
10  
11  
12

## 13 14 15 16 **RESULTS**

17  
18 This study consisted of 497 participants with the average age of 72.1. Among the  
19 respondents, 32.9% had COPD, and 67.1% had no COPD. The proportion of respondents  
20 with stressful life events in the past one year was 43.4%. The socio-demographic and  
21 psychological characteristics of study participants with and without COPD are shown in  
22 Table 1. No significant difference in the number of stressful life events or perceived  
23 stress was observed between COPD and non-COPD participants.  
24  
25  
26  
27  
28  
29  
30  
31  
32

33 Table 1 shows the scores of pulmonary and cognitive functions, depressive  
34 symptoms, physical and mental functioning in participants with and without COPD. In  
35 Table 2, two-way analysis of variance showed significant main effects of COPD for  
36 decreased post-bronchodilator FEV<sub>1</sub> ( $p < 0.001$ ) and higher CFQ scores ( $p = 0.020$ ) after  
37 adjustment of sex, age, ethnicity, smoking status, and number of chronic illness,  
38 indicating impaired pulmonary and cognitive functions in participants with COPD.  
39  
40  
41  
42  
43  
44  
45  
46  
47  
48

49 Significant main effects of stress were found for GDS ( $p < 0.001$ ), SF36-PCS  
50 ( $p = 0.008$ ) and SF36-MCS ( $p < 0.001$ ) scores, and significant interactions of stress with  
51 COPD were found as well for GDS ( $p = 0.001$ ), SF36-PCS ( $p = 0.045$ ), and SF36-MCS  
52 ( $p = 0.034$ ) scores (Table 2). The simple effects of life event stress on GDS, SF36-PCS  
53 and SF36-MCS are shown for participants with and without COPD respectively (Figure 1).  
54  
55  
56  
57  
58  
59  
60

Increasing stress score was associated with higher GDS score, lower SF12-PCS and lower SF12-MCS scores in participants with COPD, more than in those without COPD after adjusting for potential confounders, indicating the association of life event stress with worse physical and psychological health in COPD.

**Table 1. Socio-demographic, pulmonary and psychological variables of study participants aged 65 or older (Singapore Longitudinal Aging Study, SLAS)**

|                                           | COPD  |            | Non-COPD |            |
|-------------------------------------------|-------|------------|----------|------------|
|                                           | N     | %          | N        | %          |
| Total                                     | 136   | 32.9       | 277      | 67.1       |
| Sex                                       |       |            |          |            |
| Male                                      | 58    | 42.6       | 112      | 40.7       |
| Female                                    | 78    | 57.4       | 163      | 59.3       |
| Age (years, M $\pm$ SD)                   | 73.19 | $\pm$ 5.87 | 71.23    | $\pm$ 5.47 |
| Ethnicity                                 |       |            |          |            |
| Chinese                                   | 121   | 89.0       | 241      | 87.6       |
| Non-Chinese                               | 15    | 11.0       | 34       | 12.4       |
| Smoking                                   |       |            |          |            |
| Never smoker                              | 77    | 57.6       | 211      | 77.3       |
| Past smoker                               | 29    | 21.6       | 41       | 15.0       |
| Present smoker < 10 cigarettes daily      | 18    | 13.4       | 12       | 4.4        |
| Present smoker $\geq$ 10 cigarettes daily | 10    | 7.5        | 9        | 3.3        |
| Number of chronic diseases                | 2.60  | $\pm$ 1.30 | 1.65     | 1.25       |
| Number of Negative Life Events            | 0.67  | $\pm$ 0.98 | 0.74     | $\pm$ 1.11 |
| Life Event Stress Score                   | 0.09  | $\pm$ 0.16 | 0.10     | $\pm$ 0.16 |
| Post-bronchodilator FEV <sub>1</sub>      | 1.41  | $\pm$ 0.05 | 1.70     | $\pm$ 0.04 |
| CFQ Score                                 | 36.1  | $\pm$ 1.11 | 38.1     | $\pm$ 0.98 |
| MMSE Score                                | 25.6  | $\pm$ 0.32 | 26.2     | $\pm$ 0.29 |
| GDS Depression score                      | 1.18  | $\pm$ 0.19 | 1.14     | $\pm$ 0.17 |
| SF-36 PCS                                 | 45.0  | $\pm$ 0.85 | 45.4     | $\pm$ 0.75 |
| SF-36 MCS                                 | 53.8  | $\pm$ 0.82 | 53.9     | $\pm$ 0.74 |

Figures in table denote mean  $\pm$  SD or number and %.

**Table 2. Two-way ANOVA: Life event stress, COPD and mental and physical variables**

|                          | Main Effects of COPD |        | Main Effects of Stress |        | Interaction |       |
|--------------------------|----------------------|--------|------------------------|--------|-------------|-------|
|                          | F                    | P      | F                      | p      | F           | p     |
| Post-bronchodilator FEV1 | 17.458               | <0.001 | 0.323                  | 0.570  | 2.057       | 0.152 |
| CFQ Score                | 5.424                | 0.020  | 1.927                  | 0.166  | 2.514       | 0.114 |
| MMSE Score               | 1.799                | 0.181  | 1.159                  | 0.282  | 0.380       | 0.538 |
| GDS Depression score     | 2.353                | 0.126  | 64.500                 | <0.001 | 10.970      | 0.001 |
| SF-36 PCS                | 0.432                | 0.512  | 7.054                  | 0.008  | 4.055       | 0.045 |
| SF-36 MCS                | 0.659                | 0.417  | 14.710                 | <0.001 | 4.538       | 0.034 |

Adjusted variables: sex, age, ethnicity, smoking status, and number of chronic illness.

FEV1=Forced Expiratory Volume in the first second; CFQ=Cognitive Failure Questionnaire; MMSE=Mini-Mental State Examination; IADL=Instrumental Activities of Daily Living; GDS=the Geriatric Depression Scale; SF-36=36-Item Short-Form Healthy Survey; PCS=Physical Health Component Summary; MCS= Mental Health Component Summary.

## DISCUSSION

The principal finding in this study indicated that life event stress was associated with more depressive symptoms, and worse mental and physical functioning in both COPD and non-COPD participants (main effects), but this effect was much more aggravated in COPD than in non-COPD individuals (interactive effect). To our knowledge,

1  
2  
3 no other studies have reported demonstrating this relationship. These results suggest  
4 that individuals with COPD may be more susceptible to the adverse impact of life event  
5 stress than non-COPD individuals.  
6  
7  
8  
9

10  
11 Using a macro-social approach, investigators have reported an ecological study of  
12 50 states in the USA showing that higher levels of stressful events was associated with  
13 higher smoking prevalence as well as higher mortality from lung cancer and COPD. (11).  
14 To our knowledge, this is the only circumstantial evidence suggesting an etiological link  
15 between stress and the development of COPD. However, in our study, we found no  
16 significant associations between life event stress and COPD in support of this link at the  
17 individual level.  
18  
19  
20  
21  
22  
23  
24  
25  
26  
27  
28

29 Among individuals with COPD in this study, it is given that the heavy burden of the  
30 disease and the illness experience from difficulties in breathing and exacerbations,  
31 emotional functioning, sleep and rest, physical mobility, social interaction, recreation,  
32 work and finance are in themselves a principal stressor [8, 9]. This may possibly have a  
33 knock-on effect on the frequency and perceived stressfulness of non-illness related  
34 negative life events encountered. However, we found that COPD participants actually  
35 did not report more life event occurrence or stress than non-COPD participants as a  
36 result. They thus appeared to experience the same number of life events and perceived  
37 them to be equally stressful as their non-COPD counterparts, but experienced  
38 differentially greater psychological distress and poorer daily life functioning as a result.  
39  
40  
41  
42  
43  
44  
45  
46  
47  
48  
49  
50  
51  
52

53 Given the complex nature of stress and its interaction with coping ability, an  
54 individual's internal psychological coping resources will determine how a negative life  
55 event is perceived and appraised and impact on wellbeing [26]. Given that the  
56  
57  
58  
59  
60

1  
2  
3 perception of stress were the same in both COPD and non-COPD individuals, differences  
4  
5 in psychological coping ability does not appear to explain the greater psychological  
6  
7 morbidity in COPD. This suggests the possibility that an underlying psychobiological  
8  
9 basis [26] may explain why COPD patients are more vulnerable to the adverse health  
10  
11 and functional impacts of stress. More studies are greatly needed given the small  
12  
13 number of existing studies.  
14

15  
16  
17  
18 Our secondary finding of the main effects of COPD on FEV1 was expected and thus  
19  
20 not surprising. However, the association of COPD with more frequent cognitive  
21  
22 problems was interesting, although the results for MMSE score were not significant,  
23  
24 possibly due to sample size limitation. These results are consistent with clinical and  
25  
26 population studies that indicate significant cognitive effects of COPD on deficits in  
27  
28 abstract reasoning, [27] complex visual motor process, [28] and verbal learning, [29]  
29  
30 language,[30] attention, [31] information processing speed [31-33] and verbal learning  
31  
32 and memory. [32, 33]  
33  
34  
35  
36

37 The present study has strengths and limitations. The case definition for COPD was  
38  
39 accurately based on symptom and post-bronchial dilatation spirometric measures of  
40  
41 chronic airflow obstruction that are diagnostic of COPD according to GOLD  
42  
43 recommended criteria. The measure of life event stress was modified to exclude illness-  
44  
45 related stress from chronic diseases in this older population. The results from this  
46  
47 general population-based study are largely free of clinical selection bias, and also  
48  
49 controlled for important confounding by demographic and psychosocial variables in the  
50  
51 analysis. A limitation of the study is that definite causal inferences cannot be made  
52  
53 from the cross-sectional findings in this study. Further longitudinal studies are required.  
54  
55  
56  
57  
58  
59  
60

1  
2  
3 In conclusion, the present study found that life event stress was associated with  
4 more depressive symptoms and worse mental and physical functioning in individuals  
5 with COPD, much more than in those without COPD. Further studies should explore the  
6 psychobiological mechanisms and the role of psychological interventions in COPD.  
7  
8  
9  
10

## 11 12 13 14 15 16 **ACKNOWLEDGEMENTS**

17  
18 The authors thank the following voluntary welfare organizations for their support of the  
19 Singapore Longitudinal Ageing Studies: Geylang East Home for the Aged, Presbyterian  
20 Community Services, Thye Hua Kwan Moral Society (Moral Neighbourhood Links),  
21 Yuhua Neighbourhood Link, Henderson Senior Citizens' Home, NTUC Eldercare Co-op  
22 Ltd, Thong Kheng Seniors Activity Centre (Queenstown Centre) and Redhill Moral  
23 Seniors Activity Centre.  
24  
25  
26  
27  
28  
29  
30

31  
32  
33 The study is supported by a research grant (No. 03/1/21/17/214) from the Biomedical  
34 Research Council, Agency for Science, Technology and Research (ASTAR).  
35  
36  
37  
38  
39

## 40 **DECLARATION OF INTEREST**

41  
42 The authors declare that there are no declarations of interest in relation to the current  
43 study. The authors are responsible for the writing and the content of this article.  
44  
45

## 46 **DATA SHARING STATEMENT**

47  
48 There is no additional data available.  
49  
50  
51  
52  
53  
54  
55  
56  
57  
58  
59  
60

## References

- 1 **Jemal A**, Ward E, Hao Y, *et al*. Trends in the leading causes of death in the United States, 1970-2002. *JAMA : the journal of the American Medical Association*. 2005; **294**: 1255-9.
- 2 **Murray CJ**, Lopez AD. Global mortality, disability, and the contribution of risk factors: Global Burden of Disease Study. *Lancet*. 1997; **349**: 1436-42.
- 3 **Repetti RL**, Taylor SE, Seeman TE. Risky families: family social environments and the mental and physical health of offspring. *Psychol Bull*. 2002; **128**: 330-66.
- 4 **Marin MF**, Lord C, Andrews J, *et al*. Chronic stress, cognitive functioning and mental health. *Neurobiol Learn Mem*. 2011.
- 5 **McSweeney AJ**, Grant I, Heaton RK, *et al*. Life quality of patients with chronic obstructive pulmonary disease. *Arch Intern Med*. 1982; **142**: 473-8.
- 6 **Kim HF**, Kunik ME, Molinari VA, *et al*. Functional impairment in COPD patients: the impact of anxiety and depression. *Psychosomatics*. 2000; **41**: 465-71.
- 7 **Cully JA**, Graham DP, Stanley MA, *et al*. Quality of life in patients with chronic obstructive pulmonary disease and comorbid anxiety or depression. *Psychosomatics*. 2006; **47**: 312-9.
- 8 **DeVito AJ**. Dyspnea during hospitalizations for acute phase of illness as recalled by patients with chronic obstructive pulmonary disease. *Heart Lung*. 1990; **19**: 186-91.
- 9 **Gurney-Smith B**, Cooper MJ, Wallace LM. Anxiety and Panic in Chronic Obstructive Pulmonary Disease: The Role of Catastrophic Thoughts. *Cognitive Therapy and Research*. 2002; **26**: 143-55.
- 10 **Gueli N**, Verrusio W, Linguanti A, *et al*. Montelukast therapy and psychological distress in chronic obstructive pulmonary disease (COPD): a preliminary report. *Archives of gerontology and geriatrics*. 2011; **52**: e36-9.
- 11 **Colby JP**, Linsky AS, Straus MA. Social stress and state-to-state differences in smoking and smoking related mortality in the United States. *Soc Sci Med*. 1994; **38**: 373-81.
- 12 **Jacobsen HE**, Andenaes R. Third year nursing students' understanding of how to find and evaluate information from bibliographic databases and Internet sites. *Nurse Educ Today*. 2011; **31**: 898-903.
- 13 **Andenaes R**, Kalfoss MH, Wahl AK. Coping and psychological distress in hospitalized patients with chronic obstructive pulmonary disease. *Heart Lung*. 2006; **35**: 46-57.
- 14 **Marin MF**, Lord C, Andrews J, *et al*. Chronic stress, cognitive functioning and mental health. *Neurobiol Learn Mem*. 2011; **96**: 583-95.
- 15 **Ng TP**, Broekman BFP, Niti M, *et al*. Determinants of Successful Aging Using a Multidimensional Definition Among Chinese Elderly in Singapore. *American Journal of Geriatric Psychiatry*. 2009; **17**: 407-16.
- 16 **Niti M**, Ng TP, Kua EH, *et al*. Depression and chronic medical illnesses in Asian older adults: the role of subjective health and functional status. *Int J Geriatr Psychiatry*. 2007; **22**: 1087-94.
- 17 **Global Initiative for Chronic Obstructive Lung Disease**. Global strategy for the diagnosis, management and prevention of chronic obstructive pulmonary disease. Executive summary. *NHLBI/WHO workshop report*. 2001.
- 18 **Andenaes R**, Moum T, Kalfoss MH, *et al*. Changes in health status, psychological distress, and quality of life in COPD patients after hospitalization. *Qual Life Res*. 2006; **15**: 249-57.
- 19 **Andenaes R**. Psychological characteristics of patients with chronic obstructive pulmonary disease: a review. *J Psychosom Res*. 2005; **59**: 427-8.
- 20 **Yesavage JA**, Brink TL, Rose TL, *et al*. Development and validation of a geriatric depression screening scale: a preliminary report. *Journal of psychiatric research*. 1982; **17**: 37-49.
- 21 **Lim PP**, Ng LL, Chiam PC, *et al*. Validation and comparison of three brief depression scales in an elderly Chinese population. *Int J Geriatr Psychiatry*. 2000; **15**: 824-30.
- 22 **Broadbent DE**, Cooper PF, FitzGerald P, *et al*. The Cognitive Failures Questionnaire (CFQ) and its correlates. *Br J Clin Psychol*. 1982; **21 (Pt 1)**: 1-16.
- 23 **Folstein MF**, Folstein SE, McHugh PR. "Mini-mental state". A practical method for grading the cognitive state of patients for the clinician. *Journal of psychiatric research*. 1975; **12**: 189-98.
- 24 **Ware JE**, Sherbourne CD. The MOS 36-item short-form health survey (SF-36). I. Conceptual framework and item selection. *Med Care*. 1992; **30**: 473-83.
- 25 **Thumboo J**, Fong KY, Machin D, *et al*. A community-based study of scaling assumptions and construct validity of the English (UK) and Chinese (HK) SF-36 in Singapore. *Qual Life Res*. 2001; **10**: 175-88.
- 26 **Brooks RB**. Children at Risk - Fostering Resilience and Hope. *Am J Orthopsychiat*. 1994; **64**: 545-53.
- 27 **Grant I**, Heaton RK, McSweeney AJ, *et al*. Neuropsychologic findings in hypoxemic chronic obstructive pulmonary disease. *Archives of internal medicine*. 1982; **142**: 1470-6.



- 1  
2  
3 28 **Fix AJ**, Golden CJ, Daughton D, *et al.* Neuropsychological deficits among patients with chronic  
4 obstructive pulmonary disease. *The International journal of neuroscience.* 1982; **16**: 99-105.  
5 29 **Klein M**, Gauggel S, Sachs G, *et al.* Impact of chronic obstructive pulmonary disease (COPD) on  
6 attention functions. *Respiratory medicine.* 2010; **104**: 52-60.  
7 30 **Cerhan JR**, Folsom AR, Mortimer JA, *et al.* Correlates of cognitive function in middle-aged adults.  
8 Atherosclerosis Risk in Communities (ARIC) Study Investigators. *Gerontology.* 1998; **44**: 95-105.  
9 31 **Anstey KJ**, Windsor TD, Jorm AF, *et al.* Association of pulmonary function with cognitive  
10 performance in early, middle and late adulthood. *Gerontology.* 2004; **50**: 230-4.  
11 32 **Sachdev PS**, Anstey KJ, Parslow RA, *et al.* Pulmonary function, cognitive impairment and brain  
12 atrophy in a middle-aged community sample. *Dementia and geriatric cognitive disorders.* 2006; **21**: 300-8.  
13 33 **Min JY**, Min KB, Paek D, *et al.* The association between neurobehavioral performance and lung  
14 function. *Neurotoxicology.* 2007; **28**: 441-4.  
15  
16  
17  
18  
19  
20  
21  
22  
23  
24  
25  
26  
27  
28  
29  
30  
31  
32  
33  
34  
35  
36  
37  
38  
39  
40  
41  
42  
43  
44  
45  
46  
47  
48  
49  
50  
51  
52  
53  
54  
55  
56  
57  
58  
59  
60

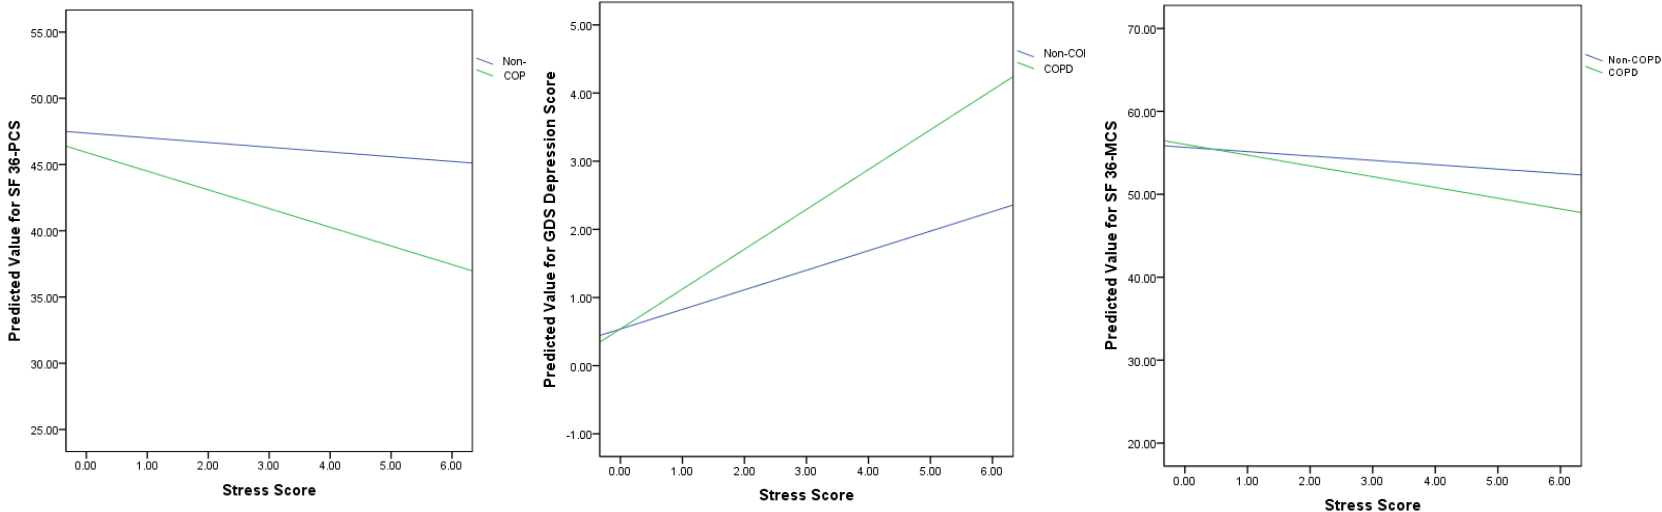

**Figure 1. Predicted value for SF-36 PCS, GDS depression score and SF 36-MCS in participants with and without COPD**

SF-36=36-Item Short-Form Healthy Survey; PCS=Physical Health Component Summary; GDS=the Geriatric Depression Scale; MCS= Mental Health Component Summary.

1  
2  
3  
4  
5  
6  
7  
8  
9  
10  
11  
12  
13  
14  
15  
16  
17  
18  
19  
20  
21  
22  
23  
24  
25  
26  
27  
28  
29  
30  
31  
32  
33  
34  
35  
36  
37  
38  
39  
40  
41  
42  
43



**Life Event Stress and Chronic Obstructive Pulmonary Disease (COPD): Associations with Mental Wellbeing and Quality of Life in a Population-based Study**

|                                                                                                                                                                                                                             |                                                                                                                                                                                                                                                                                                                                                                                                                                                                                                                                                                                                                                                                                                                       |
|-----------------------------------------------------------------------------------------------------------------------------------------------------------------------------------------------------------------------------|-----------------------------------------------------------------------------------------------------------------------------------------------------------------------------------------------------------------------------------------------------------------------------------------------------------------------------------------------------------------------------------------------------------------------------------------------------------------------------------------------------------------------------------------------------------------------------------------------------------------------------------------------------------------------------------------------------------------------|
| Journal:                                                                                                                                                                                                                    | <i>BMJ Open</i>                                                                                                                                                                                                                                                                                                                                                                                                                                                                                                                                                                                                                                                                                                       |
| Manuscript ID:                                                                                                                                                                                                              | bmjopen-2012-001674.R1                                                                                                                                                                                                                                                                                                                                                                                                                                                                                                                                                                                                                                                                                                |
| Article Type:                                                                                                                                                                                                               | Research                                                                                                                                                                                                                                                                                                                                                                                                                                                                                                                                                                                                                                                                                                              |
| Date Submitted by the Author:                                                                                                                                                                                               | 23-Sep-2012                                                                                                                                                                                                                                                                                                                                                                                                                                                                                                                                                                                                                                                                                                           |
| Complete List of Authors:                                                                                                                                                                                                   | Lu, Yanxia; National University of Singapore, Department of Psychological Medicine<br>Nyunt, Ma Shwe; National University Hospital System, Gerontological Research Programme<br>Gwee, Xinyi; National University of Singapore, Department of Psychological Medicine<br>Feng, Liang; National University Hospital System, Gerontological Research Programme<br>Feng, Lei; National University of Singapore, Department of Psychological Medicine<br>Kua, Ee Heok; National University of Singapore, Department of Psychological Medicine<br>Kumar, Rajeev; Australian National University Medical School, Academic unit of psychological medicine<br>Ng, Tze Pin; National University Hospital, Psychological Medicine |
| <b>Primary Subject Heading</b>:                                                                                                                                                                                             | Mental health                                                                                                                                                                                                                                                                                                                                                                                                                                                                                                                                                                                                                                                                                                         |
| Secondary Subject Heading:                                                                                                                                                                                                  | Epidemiology                                                                                                                                                                                                                                                                                                                                                                                                                                                                                                                                                                                                                                                                                                          |
| Keywords:                                                                                                                                                                                                                   | MENTAL HEALTH, PSYCHIATRY, RESPIRATORY MEDICINE (see Thoracic Medicine)                                                                                                                                                                                                                                                                                                                                                                                                                                                                                                                                                                                                                                               |
| <p>Note: The following files were submitted by the author for peer review, but cannot be converted to PDF. You must view these files (e.g. movies) online.</p> <p>STROBE_checklist_BMJ-Open_cross-sectional-studies.doc</p> |                                                                                                                                                                                                                                                                                                                                                                                                                                                                                                                                                                                                                                                                                                                       |

SCHOLARONE™  
Manuscripts

1  
2  
3  
4 **Life Event Stress and Chronic Obstructive Pulmonary Disease (COPD): Associations with**  
5 **Mental Wellbeing and Quality of Life in a Population-based Study**  
6  
7

8  
9 Running title: Stress & COPD  
10

11  
12 Yanxia Lu<sup>1, 2</sup>, Ma Shwe Zin Nyunt<sup>1, 2</sup>, Gwee Xinyi<sup>1, 2</sup>, Liang Feng<sup>1, 2</sup>, Lei Feng<sup>1, 2</sup>, Ee Heok  
13 Kua<sup>1, 2</sup>, Rajeev Kumar<sup>3</sup>, Tze Pin Ng<sup>1, 2</sup>.  
14

15  
16  
17 <sup>1</sup>Gerontological Research Programme, Yong Loo Lin School of Medicine, National  
18 University of Singapore  
19

20 <sup>2</sup>Department of Psychological Medicine, National University Hospital System, Singapore  
21

22 <sup>3</sup>Academic unit of psychological medicine, Australian National University Medical School,  
23 Canberra, Australia  
24

25  
26 Author responsible for correspondence and request for reprints:  
27

28 A/P Tze-Pin Ng  
29

30 Gerontological Research Programme, National University of Singapore,  
31

32 Department of Psychological Medicine,  
33

34 NUHS Tower Block, 9<sup>th</sup> Floor, 1E Kent Ridge Road, Singapore 119228  
35

36 Fax: 65-67772191, Tel: 65-67723478 Email: [pcmngtp@nus.edu.sg](mailto:pcmngtp@nus.edu.sg)  
37

38 The study was supported by a research grant (No. 03/1/21/17/214) from the Biomedical  
39 Research Council, Agency for Science, Technology and Research (ASTAR).  
40

41 Word count  
42

43 Text: 2645 words  
44

45 Abstract: 199 words  
46

47 Tables: 2  
48

49 Figure: 1  
50

51 **Key Words:** Life event stress; COPD; Cognitive function; Physical and psychological well-  
52 being; Quality of life  
53  
54  
55  
56  
57  
58  
59  
60

## ARTICAL SUMMARY

### Article focus

- The impact of life event stress on the mental wellbeing and quality of life of individuals with chronic obstructive pulmonary disease (COPD).

### Key messages

- Our findings showed that in individuals with COPD, life event stress had a greater detrimental effect on mental health and quality of life in comparison to non-COPD individuals.

### Strengths and limitations of this study

- The case definition for COPD in this study was accurately based on symptom and post-bronchial dilatation spirometric measures of chronic airflow obstruction that are diagnostic of COPD according to GOLD recommended criteria.
- The results from this general population-based study are largely free of clinical selection bias, and also controlled for important confounding by demographic and psychosocial variables in the analysis.
- Definite causal inferences cannot be made from the cross-sectional findings in this study. Further longitudinal studies are required.

**Abstract**

**Objectives:** To investigate whether life event stress was associated with greater psychological distress and poorer quality of life in older individuals with COPD, in comparison to their counterparts without COPD

**Design:** Cross-sectional study.

**Participants:** A population-based sample (N=497) of individuals aged 65 and above with COPD (post-bronchodilatation FEV<sub>1</sub>/FVC<0.70, N=136) and without COPD (N=277).

**Measurements:** We measured life event stress, depressive symptoms (GDS), cognitive symptoms and function (CFQ, MMSE), and physical and mental health functional status (SF36-PCS and SF36-MCS) in participants with and without COPD.

**Results:** In two-way analysis of variance controlling for potential confounders, life event stress was associated with significant main effects of worse GDS ( $p<0.001$ ), SF36-PCS ( $p=0.008$ ) and SF36-MCS scores ( $p<0.001$ ), and with significant interaction effects on GDS score ( $p<0.001$ ), SF36-PCS ( $p=0.045$ ) and SF36-MCS ( $p=0.034$ ) in participants with COPD more than in non-COPD participants. Main effect of COPD was found for post-bronchodilator FEV<sub>1</sub> ( $p<0.001$ ) and cognitive symptoms ( $p=0.02$ ).

**Conclusions:** Our findings indicate that life event stress was associated with more depressive symptoms and worse quality of life in individuals with COPD, much more than in those without COPD. Further studies should explore the role of cognitive appraisal of stress, coping resources and psycho-social support in this relationship.

## INTRODUCTION

Chronic obstructive pulmonary disease (COPD) stands out among chronic diseases with its high and rising prevalence and mortality [1], poor quality of life, frequent hospitalization and huge societal burden of care [2]. Because patients with COPD bear a heavy burden of psychological disturbance, psychiatric morbidity, and disability in daily living activities [3, 4], the mental health of COPD patients has received growing attention in recent years.

Life event stress is increasingly recognized to play important roles in the development and outcomes of chronic illness such as type II diabetes, coronary heart disease, gastroenterological disorders and obstetric outcomes [5]. Stress is well known to result in depression, psychological burnout, post-traumatic stress disorder (PTSD) in all ages, as well as cognitive impairment in late life [6]. Among COPD patients, an intrinsic source of stress is directly related to their illness, involving the experience of anxiety and distress provoked by breathing difficulties [7, 8], including muddled thoughts, heightened emotions, extreme fear and panic and decreased physical energy, and various difficulties in emotional functioning, sleep and rest, physical mobility, social interaction, activities of daily living, recreation, work and finance. However, the impact of life event stress in general including those extrinsic to illness-related experience on the physical and mental functioning and quality of life of individuals with COPD in comparison to non-COPD individuals has rarely been investigated [9, 10, 6]. The aim of this study was to investigate whether life event stress was associated with greater psychological distress and poorer quality of life in older individuals with COPD, in comparison to their counterparts without COPD.

The present study analyzed data collected on COPD status, life event stress, and measures of pulmonary function, cognitive function, depressive symptoms and quality of life in a population-based sample (Singapore Longitudinal Aging Study) [11] to

1  
2  
3 investigate the effect of life event stress on psychological functioning and quality of life.  
4  
5 We hypothesized that life event stress in the whole sample would be associated with  
6  
7 depressive symptoms and poor quality of life (main effect), but would have a stronger  
8  
9 association among individuals with COPD than among non-COPD individuals  
10  
11 (interaction), suggesting a greater detrimental effect on depressive symptoms and  
12  
13 quality of life. A secondary relationship analyzed in two-way analysis of variance (ANOVA)  
14  
15 was the main effect of COPD status (and its interaction with life event stress) on  
16  
17 primary outcomes of pulmonary and cognitive function, based on the known effects of  
18  
19 impaired pulmonary and cognitive function in COPD.  
20  
21  
22  
23

## 24 25 **METHODS**

### 26 27 **Study Design and Participants**

28  
29 The participants in the study were a subsample recruited from one locality (Bukit  
30  
31 Merah) in the South Central region of Singapore Longitudinal Aging Study (SLAS-2), a  
32  
33 prospective population-based cohort study of aging and health of community-dwelling  
34  
35 elderly [12]. We interviewed one participant from each household who were  
36  
37 Singaporean citizens or permanent residents aged 65 or older who were able to give  
38  
39 informed consent. Those who were too frail or ill and unable to complete the interview,  
40  
41 for reasons such as from post-stroke aphasia, cachexia or profound dementia, were  
42  
43 excluded. The participants who completed interviews and provided technically  
44  
45 acceptable spirometric data (N=497) represented a response rate of 78.5% of the  
46  
47 eligible participants. All participants signed written informed consent for the study  
48  
49 which was approved by the National University of Singapore Institutional Review Board.  
50  
51

### 52 53 **COPD**

54  
55 We identified cases of COPD among the participants who had characteristic  
56  
57 symptoms of COPD and spirometric evidence of chronic airflow obstruction (post-  
58  
59  
60



1  
2  
3 bronchial dilatation  $FEV_1/FVC < 0.70$ ), in accordance with the definition recommended  
4  
5 by the Global Initiative for Chronic Obstructive Lung Disease (GOLD) [13].  
6

7 Questions from the British Medical Research Council Questionnaire on chronic  
8  
9 respiratory symptoms were used to elicit symptoms characteristic of COPD: chronic  
10  
11 cough and/or sputum lasting at least 3 months in the year and/or breathlessness on  
12  
13 exertion.  
14

15  
16 Ventilatory function testing was performed using a portable, battery operated,  
17  
18 ultrasound transit-time based spirometer (Easy-One; Model 2001 Diagnostic Spirometer,  
19  
20 NDD Medical Technologies, Zurich, Switzerland). Calibration was checked daily with a 3-  
21  
22 L syringe. Forced expiratory maneuvers were performed with the respondent seated  
23  
24 with recommended guidelines and standardization of procedures: at least three  
25  
26 acceptable maneuvers, with forced vital capacity (FVC) and forced expiratory volume in  
27  
28 the first second ( $FEV_1$ ) reproducible within 200 ml. Chronic airflow obstruction as  
29  
30 defined as post-bronchial dilatation  $FEV_1/FVC < 0.70$ .  
31  
32

### 33 **Life Event Stress**

34  
35 Life event stress was measured by an 11-item life events inventory [14, 15] that  
36  
37 excluded personal illness experiences directly related to COPD. The participants were  
38  
39 asked to indicate yes or no as to whether any of eleven life events had occurred over  
40  
41 the past year ("spouse or partner die, a close friend or family member die or have a  
42  
43 serious illness (other than your spouse or partner), major problems with money, a  
44  
45 divorce or breakup, family member or close friend have a divorce or breakup, major  
46  
47 conflict with children or grandchildren, major accidents, disasters, muggings, unwanted  
48  
49 sexual experiences, robberies, or similar events, a family member or close friend lose  
50  
51 their job or retire, physically abused, verbally abused, or pet die"). If the participant  
52  
53 indicated (a) life event(s) had occurred, he/she was asked to appraise the event and  
54  
55 indicate on a scale of 1 (did not upset me) to 3 (upset me greatly) the extent it upset  
56  
57  
58  
59  
60

1  
2  
3 them. Frequency of life event stress was calculated. The scale also provides a life event  
4 stress score appraised by the participant that ranged from 0 to 33 with a higher score  
5 indicating a participant experienced a greater number of more stressful events.  
6  
7  
8

### 9 10 **Depressive Symptoms**

11  
12 The presence of depressive symptoms was determined by a depression screening  
13 scale for elderly populations, the 15-item Geriatric Depression Scale (GDS-15) with  
14 scores ranging from 0 to 15 [16]. The GDS was well suited for the study because it is  
15 largely free of the measurement artefact due to overlapping somatic symptoms of  
16 physical illness(es) and depression. In validation studies in the local older population  
17 [17], translated versions of the GDS-15 have been found to be a valid and reliable  
18 screening tool for depression: Cronbach's alpha of 0.80, and intraclass coefficients of  
19 test-retest reliability of 0.83 and inter-rater reliability of 0.94. Using a GDS cutoff of  $\geq 5$ ,  
20 the GDS-15 has a sensitivity of 0.97 and specificity of 0.95 (area under curve of 0.98)  
21 for determining major depressive disorder according to DSM-IV criteria. Depressive  
22 symptoms defined as such by  $GDS \geq 5$  is clinically significant, and such cases including  
23 "sub-threshold" depression, had been shown in the same population to be associated  
24 with significantly poorer mental and physical health and functional status, and more  
25 healthcare resource utilization compared to non-cases and were similar to or worse  
26 than syndrome threshold cases of depression [18].  
27  
28  
29  
30  
31  
32  
33  
34  
35  
36  
37  
38  
39  
40  
41  
42  
43

### 44 **Cognitive Function**

45  
46 Cognitive function was measured using the Cognitive Failures Questionnaire (CFQ)  
47 [19] and the Mini-Mental State Examination (MMSE) which were validated and widely  
48 used instruments to assess global cognitive functioning [20]. The CFQ uses a 5-point  
49 Likert-type scale (1 = Never, 5 = Very often) to evaluate self-reported cognitive problems  
50 (e.g., "Do you need to re-read instructions several times?"). Higher CFQ scores indicate  
51 more frequent cognitive problems and higher MMSE scores (0 to 30) indicate better  
52  
53  
54  
55  
56  
57  
58  
59  
60

1  
2  
3 global cognitive functioning, and MMSE scores of 23 or less are considered to be  
4  
5 cognitively impaired.  
6

### 7 **Physical and Mental Functioning**

8  
9 Physical and mental functional well-being was measured by the Medical Outcomes  
10 Study 36-item Short Form (SF-36) [21] which has been previously validated for use in  
11 Singaporeans [22]. Weighted summary measures of Physical Health Component  
12 Summary (PCS) score and Mental Health Component Summary (MCS) score were  
13  
14 computed with higher scores indicating better physical and mental health functioning  
15  
16 and quality of life.  
17  
18  
19  
20  
21

### 22 **Statistical Analyses**

23  
24 Data analysis was performed using the software package PASW Statistics version  
25 18. In preliminary univariate analysis, participants with and without COPD were  
26 compared with respect to differences in number of life events, and perceived stress  
27 score, level of FEV1, CFQ, MMSE, GDS depression, SF-36 PCS and SF-36 MCS scores, as  
28 well as potential confounding variables, sex, age, ethnicity, smoking status, number of  
29 chronic diseases, using t-tests or chi-squared tests of significance. The independent  
30 main effects of life event stress and COPD (independent variables) as well as the  
31 interaction effects of life event stress and COPD on measures of pulmonary function,  
32 depressive symptoms, cognitive function, and quality of life (dependent variables) were  
33 analyzed using two-way analysis of variance (ANOVA) and general linear model which  
34 adjusted for sex, age, ethnicity, smoking status, and number of chronic illness. The  
35 independent variable of primary interest was life event stress, and the primary outcome  
36 variables of interest were depressive symptoms and quality of life. A secondary  
37 relationship analyzed in the two-way ANOVA model was the main effect of COPD status  
38 (and its interaction with life event stress) on primary outcomes of pulmonary and  
39 cognitive function. For the outcome variables with significant interaction of life event  
40  
41  
42  
43  
44  
45  
46  
47  
48  
49  
50  
51  
52  
53  
54  
55  
56  
57  
58  
59  
60

1  
2  
3 stress and COPD, the simple effects of their relationships with life event stress score  
4  
5 were investigated respectively in participants with and without COPD. Statistical  
6  
7 significance was set at  $p < 0.05$ .  
8  
9

## 10 11 **RESULTS**

12  
13  
14 This study consisted of 497 participants with the average age of 72.1. Among the  
15  
16 respondents, 32.9% had COPD, and 67.1% had no COPD. The proportion of respondents  
17  
18 with stressful life events in the past one year was 43.4%. The socio-demographic and  
19  
20 psychological characteristics of study participants with and without COPD are shown in  
21  
22 Table 1. Participants with COPD were found to have higher mean age ( $t=3.328$ ,  
23  
24  $p=0.001$ ), higher proportion of smokers ( $\chi^2 = 20.586$ ,  $df=3$ ,  $p < 0.001$ ) and increased  
25  
26 number of diseases ( $t=7.096$ ,  $p < 0.001$ ). No significant difference in the number of life  
27  
28 events or perceived stress was observed between COPD and non-COPD participants  
29  
30 ( $p > 0.05$ ).  
31  
32

33  
34 Table 1 shows that compared with those without COPD, participants with COPD  
35  
36 had decreased post-bronchodilator FEV1 ( $t=6.185$ ,  $p < 0.001$ ), MMSE score ( $t=3.090$ ,  
37  
38  $p=0.002$ ) and SF-36 PCS ( $t=2.726$ ,  $p=0.007$ ) score. There were no difference in CFQ  
39  
40 and GDS depression scores between participants with and without COPD ( $p > 0.05$ ) in  
41  
42 the whole sample. Next, we evaluated the effect of life event stress on GDS, CFQ, MMSE,  
43  
44 SF-36 PCS and SF-36 MCS scores by subgroups of participants with COPD and without  
45  
46 COPD. As shown in Table 2, two-way analysis of variance in general linear model  
47  
48 showed significant main effects of life event stress for GDS ( $F=64.500$ ,  $df=1$ ,  $p < 0.001$ ),  
49  
50 SF36-PCS ( $F=7.054$ ,  $df=1$ ,  $p=0.008$ ) and SF36-MCS ( $F=14.710$ ,  $df=1$ ,  $p < 0.001$ ) scores,  
51  
52 and significant interactions of life event stress with COPD were found as well for GDS  
53  
54 ( $F=10.970$ ,  $df=1$ ,  $p=0.001$ ), SF36-PCS ( $F=4.055$ ,  $df=1$ ,  $p=0.045$ ), and SF36-MCS  
55  
56 ( $F=4.538$ ,  $df=1$ ,  $p=0.034$ ) scores. The simple effects of life event stress on GDS, SF36-  
57  
58  
59  
60

PCS and SF36-MCS are shown for participants with and without COPD respectively in Figure 1. Increasing stress score was associated with higher GDS score, lower SF12-PCS and lower SF12-MCS scores in participants with COPD, more than in those without COPD after adjusting for potential confounders, indicating the association of life event stress with worse psychological distress and poorer quality of life among individuals with COPD, in comparison to non-COPD individuals. The other significant main effect found in two-way analysis of variance was of COPD for decreased post-bronchodilator FEV<sub>1</sub> (F=17.458, df=1, p<0.001) and higher CFQ scores (F=5.424, df=1, p=0.020) after adjustment of sex, age, ethnicity, smoking status, and number of chronic illness, indicating impaired pulmonary and cognitive functions in participants with COPD.

**Table 1. Socio-demographic, pulmonary and psychological variables of study participants aged 65 or older (Singapore Longitudinal Aging Study, SLAS)**

|                                           | COPD  |            | Non-COPD |            | Significant Test      | p      |
|-------------------------------------------|-------|------------|----------|------------|-----------------------|--------|
|                                           | N     | %          | N        | %          |                       |        |
| Total                                     | 136   | 32.9       | 277      | 67.1       |                       |        |
| Sex                                       |       |            |          |            |                       |        |
| Male                                      | 58    | 42.6       | 112      | 40.7       | $\chi^2=0.138$ , df=1 | 0.710  |
| Female                                    | 78    | 57.4       | 163      | 59.3       |                       |        |
| Age (years, M $\pm$ SD)                   | 73.19 | $\pm$ 5.87 | 71.23    | $\pm$ 5.47 | t=3.328               | 0.001  |
| Ethnicity                                 |       |            |          |            |                       |        |
| Chinese                                   | 121   | 89.0       | 241      | 87.6       | $\chi^2=0.154$ , df=1 | 0.694  |
| Non-Chinese                               | 15    | 11.0       | 34       | 12.4       |                       |        |
| Smoking                                   |       |            |          |            |                       |        |
| Never smoker                              | 77    | 57.6       | 211      | 77.3       | $\chi^2=20.59$ , df=3 | <0.001 |
| Past smoker                               | 29    | 21.6       | 41       | 15.0       |                       |        |
| Current smoker < 10 cigarettes daily      | 18    | 13.4       | 12       | 4.4        |                       |        |
| Current smoker $\geq$ 10 cigarettes daily | 10    | 7.5        | 9        | 3.3        |                       |        |
| Number of chronic diseases                | 2.60  | $\pm$ 1.30 | 1.65     | 1.25       | t=7.096               | <0.001 |
| Number of Negative Life Events            | 0.67  | $\pm$ 0.98 | 0.74     | $\pm$ 1.11 | t=0.609               | 0.543  |
| Life Event Stress Score                   | 1.02  | $\pm$ 1.71 | 1.12     | $\pm$ 1.78 | t=0.525               | 0.600  |
| Post-bronchodilator FEV <sub>1</sub>      | 1.42  | $\pm$ 0.50 | 1.75     | $\pm$ 0.52 | t=6.185               | <0.001 |
| CFQ Score                                 | 38.0  | $\pm$ 9.21 | 38.8     | $\pm$ 9.83 | t=0.733               | 0.464  |
| MMSE Score                                | 26.4  | $\pm$ 3.26 | 27.4     | $\pm$ 3.11 | t=3.090               | 0.002  |
| GDS Depression score                      | 1.13  | $\pm$ 2.04 | 0.84     | $\pm$ 1.69 | t=1.487               | 0.138  |
| GDS $\geq$ 5, % (n)                       | 5.2   | (7)        | 2.9      | (8)        | $\chi^2=1.349$ , df=1 | 0.245  |
| SF-36 PCS                                 | 44.6  | $\pm$ 9.04 | 47.1     | $\pm$ 7.21 | t=2.726               | 0.007  |
| SF-36 MCS                                 | 54.9  | $\pm$ 7.83 | 55.1     | $\pm$ 6.68 | t=0.353               | 0.724  |

1  
2  
3  
4  
5  
6  
7  
8  
9  
10  
11  
12  
13  
14  
15  
16  
17  
18  
19  
20  
21  
22  
23  
24  
25  
26  
27  
28  
29  
30  
31  
32  
33  
34  
35  
36  
37  
38  
39  
40  
41  
42  
43  
44  
45  
46  
47  
48  
49  
50  
51  
52  
53  
54  
55  
56  
57  
58  
59  
60

Figures in table denote mean  $\pm$  SD or number and %.  
Smoker is defined as smoking  $\geq$  10 cigarettes daily

For peer review only

**Table 2. Two-way ANOVA: Life event stress, COPD and mental and physical variables**

|                          | Main Effects of COPD (df=1) |        | Main Effects of Stress (df=1) |        | Interaction (df=1) |       |
|--------------------------|-----------------------------|--------|-------------------------------|--------|--------------------|-------|
|                          | F                           | P      | F                             | P      | F                  | p     |
| Post-bronchodilator FEV1 | 17.458                      | <0.001 | 0.323                         | 0.570  | 2.057              | 0.152 |
| CFQ Score                | 5.424                       | 0.020  | 1.927                         | 0.166  | 2.514              | 0.114 |
| MMSE Score               | 1.799                       | 0.181  | 1.159                         | 0.282  | 0.380              | 0.538 |
| GDS Depression score     | 2.353                       | 0.126  | 64.500                        | <0.001 | 10.970             | 0.001 |
| SF-36 PCS                | 0.432                       | 0.512  | 7.054                         | 0.008  | 4.055              | 0.045 |
| SF-36 MCS                | 0.659                       | 0.417  | 14.710                        | <0.001 | 4.538              | 0.034 |

Adjusted variables: sex, age, ethnicity, smoking status, and number of chronic illness. FEV1=Forced Expiratory Volume in the first second; CFQ=Cognitive Failure Questionnaire; MMSE=Mini-Mental State Examination; GDS=the Geriatric Depression Scale; SF-36=36-Item Short-Form Healthy Survey; PCS=Physical Health Component Summary; MCS= Mental Health Component Summary.

## DISCUSSION

The principal finding in this study indicated that life event stress was associated with depressive symptoms and poor quality of life in both COPD and non-COPD participants (main effects), but showed a significantly stronger association among individuals with COPD than among non-COPD individuals (interaction), suggesting a disproportionately greater detrimental effect. To our knowledge, no other studies have reported demonstrating this relationship.

It should be noted that participants with COPD actually did not report greater frequency of occurrence or perceived stress score of non-illness related life events than non-COPD participants. Instead, individuals with COPD appeared to experience the same number of non-illness related life events and perceived them to be equally stressful as their non-COPD counterparts, yet showed disproportionately greater psychological distress and poorer quality of life. These results suggest that individuals with COPD may be more vulnerable to the adverse impact of stressful events than non-COPD individuals.

1  
2  
3 A greater detrimental effect of life event stress on psychological wellbeing and  
4 quality of life in COPD individuals may hypothetically be explained by the possibility that  
5 COPD individuals perceive and appraise stressful life events differently to individuals  
6 without COPD, or that COPD individuals have poorer coping skills or fewer social and  
7 economic resources, or both. We did not have measures of cognitive appraisal, coping  
8 resources and social support to explore these hypotheses directly, and this is a  
9 limitation of our study.  
10  
11  
12  
13  
14  
15  
16

17  
18 There are few studies that have investigated the relationship between cognitive  
19 appraisal of stressful events, coping strategies and psychological distress in COPD  
20 patients. A study by Andrenas and co-investigators [23] have assessed how hospitalized  
21 patients with acutely exacerbated COPD appraised and coped with a recent stressful  
22 event and their level of psychological distress. They reported that half of the  
23 respondents tended to perceive their stressful event as representing a threat, 26% as  
24 harmful, 7.6% as a loss, 4.3% as a challenge, and 11% characterized the stressful event  
25 in some other ways. However, the authors found that neither types of stressful event,  
26 stress intensity, primary or secondary appraisal, or number of coping strategies used  
27 were significantly related to psychological distress. Only problem-solving coping  
28 strategies were inversely related to psychological distress. This suggests that poor  
29 coping skills may be the principal psychological problem among COPD patients that  
30 contribute to their psychological distress and poor quality of life. However, further  
31 studies should be conducted.  
32  
33  
34  
35  
36  
37  
38  
39  
40  
41  
42  
43  
44  
45  
46  
47  
48

49 Our secondary finding of the main effects of COPD on FEV<sub>1</sub> was expected and thus  
50 not surprising. However, the association of COPD with more frequent cognitive  
51 problems was interesting, although the results for MMSE score were not significant  
52 after adjustment in two-way ANOVA, possibly due to sample size limitation. These  
53 results are consistent with clinical and population studies that indicate significant  
54  
55  
56  
57  
58  
59  
60



1  
2  
3 cognitive effects of COPD on deficits in abstract reasoning [23], complex visual motor  
4 process [24], and verbal learning [25], language [26], attention [27], information  
5 processing speed [27-29] and verbal learning and memory [28, 29].  
6  
7  
8

9  
10 The present study has strengths and limitations. The case definition for COPD is  
11 accurately based on symptom and post-bronchial dilatation spirometric measures of  
12 chronic airflow obstruction that are diagnostic of COPD according to GOLD  
13 recommended criteria. Results from this general population-based study are largely  
14 free of clinical selection bias, and also controlled for important confounding by  
15 demographic and psychosocial variables in the analysis. The measure of life event  
16 stress is modified to exclude illness-related stress from chronic diseases in this older  
17 population. However, a limitation of the life event inventory is inter-categorical variability  
18 and recall bias in the appraisal of the stressful life event [30]. In a cross-sectional study,  
19 interpreting the causal relationship between stress and the health-related functional  
20 outcomes can be uncertain. Further longitudinal studies are required.  
21  
22  
23  
24  
25  
26  
27  
28  
29  
30  
31  
32

33  
34 Studies [31-33] have reported that mental health status, including anxiety and  
35 depressive symptoms, are better predictors of COPD-related quality of life than  
36 pulmonary function. The present study supports this observation and further indicates  
37 that life event stress has a starkly detrimental effect on mental health and quality of life  
38 in patients with COPD. While it is increasingly being recognized that the identification  
39 and treatment of psychological disorders are important for improving patient centered  
40 outcomes in COPD patients, there should be commensurate attention to stressful life  
41 event(s) that trigger psychological disturbances and poor psycho-social functioning.  
42 Psychological interventions in COPD patients that include the identification of stressful  
43 life event and improving patients' coping skills may directly contribute to improving  
44 psychological functioning and quality of life in COPD patients.  
45  
46  
47  
48  
49  
50  
51  
52  
53  
54  
55  
56

57 In conclusion, the present study found that life event stress was associated with  
58  
59  
60

1  
2  
3 more depressive symptoms and worse quality of life in individuals with COPD, much  
4  
5 more than in those without COPD. Further studies should explore the role of cognitive  
6  
7 appraisal of stress, coping resources and psycho-social support in this relationship.  
8  
9

## 10 11 **ACKNOWLEDGEMENTS**

12  
13 The authors thank the following voluntary welfare organizations for their support of the  
14  
15 Singapore Longitudinal Ageing Studies: Geylang East Home for the Aged, Presbyterian  
16  
17 Community Services, Thye Hua Kwan Moral Society (Moral Neighbourhood Links),  
18  
19 Yuhua Neighbourhood Link, Henderson Senior Citizens' Home, NTUC Eldercare Co-op  
20  
21 Ltd, Thong Kheng Seniors Activity Centre (Queenstown Centre) and Redhill Moral  
22  
23 Seniors Activity Centre.  
24  
25  
26

27  
28  
29 The study is supported by a research grant (No. 03/1/21/17/214) from the Biomedical  
30  
31 Research Council, Agency for Science, Technology and Research (ASTAR).  
32  
33  
34

## 35 36 **DECLARATION OF INTEREST**

37  
38 The authors declare that there are no declarations of interest in relation to the current  
39  
40 study. The authors are responsible for the writing and the content of this article.  
41  
42  
43

## 44 45 **DATA SHARING STATEMENT**

46  
47 There is no additional data available.  
48  
49  
50  
51  
52  
53  
54  
55  
56  
57  
58  
59  
60

## References

- 1 **Jemal A**, Ward E, Hao Y, et al. Trends in the leading causes of death in the United States, 1970-2002. *JAMA : the journal of the American Medical Association*. 2005; **294**: 1255-9.
- 2 **Murray CJ**, Lopez AD. Global mortality, disability, and the contribution of risk factors: Global Burden of Disease Study. *Lancet*. 1997; **349**: 1436-42.
- 3 **Zhang MWB**, Ho RCM, Cheung MWL, et al. Prevalence of depressive symptoms in patients with chronic obstructive pulmonary disease: a systematic review, meta-analysis and meta-regression. *General hospital psychiatry*. 2011; **33**: 217-23.
- 4 **Eisner MD**, Blanc PD, Yelin EH, et al. Influence of anxiety on health outcomes in COPD. *Thorax*. 2010; **65**: 229-34.
- 5 **Repetti RL**, Taylor SE, Seeman TE. Risky families: family social environments and the mental and physical health of offspring. *Psychol Bull*. 2002; **128**: 330-66.
- 6 **Marin MF**, Lord C, Andrews J, et al. Chronic stress, cognitive functioning and mental health. *Neurobiol Learn Mem*. 2011; **96**: 583-95.
- 7 **DeVito AJ**. Dyspnea during hospitalizations for acute phase of illness as recalled by patients with chronic obstructive pulmonary disease. *Heart Lung*. 1990; **19**: 186-91.
- 8 **Gurney-Smith B**, Cooper MJ, Wallace LM. Anxiety and Panic in Chronic Obstructive Pulmonary Disease: The Role of Catastrophic Thoughts. *Cognitive Therapy and Research*. 2002; **26**: 143-55.
- 9 **Guelli N**, Verrusio W, Linguanti A, et al. Montelukast therapy and psychological distress in chronic obstructive pulmonary disease (COPD): a preliminary report. *Archives of gerontology and geriatrics*. 2011; **52**: e36-9.
- 10 **Colby JP**, Linsky AS, Straus MA. Social stress and state-to-state differences in smoking and smoking related mortality in the United States. *Soc Sci Med*. 1994; **38**: 373-81.
- 11 **Ng TP**, Broekman BFP, Niti M, et al. Determinants of Successful Aging Using a Multidimensional Definition Among Chinese Elderly in Singapore. *American Journal of Geriatric Psychiatry*. 2009; **17**: 407-16.
- 12 **Niti M**, Ng TP, Kua EH, et al. Depression and chronic medical illnesses in Asian older adults: the role of subjective health and functional status. *Int J Geriatr Psychiatry*. 2007; **22**: 1087-94.
- 13 **Global Initiative for Chronic Obstructive Lung Disease**. Global strategy for the diagnosis, management and prevention of chronic obstructive pulmonary disease. Executive summary. *NHLBI/WHO workshop report*. 2001.
- 14 **Andenaes R**, Moum T, Kalfoss MH, et al. Changes in health status, psychological distress, and quality of life in COPD patients after hospitalization. *Qual Life Res*. 2006; **15**: 249-57.
- 15 **Andenaes R**. Psychological characteristics of patients with chronic obstructive pulmonary disease: a review. *J Psychosom Res*. 2005; **59**: 427-8.
- 16 **Yesavage JA**, Brink TL, Rose TL, et al. Development and validation of a geriatric depression screening scale: a preliminary report. *Journal of psychiatric research*. 1982; **17**: 37-49.
- 17 **Nyunt MSZ**, Fones C, Niti M, et al. Criterion-based validity and reliability of the Geriatric Depression Screening Scale (GDS-15) in a large validation sample of community-living Asian older adults. *Aging Ment Health*. 2009; **13**: 376-82.
- 18 **Soh KC**, Kumar R, Niti M, et al. Subsyndromal depression in old age: clinical significance and impact. *Int Psychogeriatr*. 2008; **20**: 188-200.
- 19 **Broadbent DE**, Cooper PF, FitzGerald P, et al. The Cognitive Failures Questionnaire (CFQ) and its correlates. *Br J Clin Psychol*. 1982; **21 (Pt 1)**: 1-16.
- 20 **Folstein MF**, Folstein SE, McHugh PR. "Mini-mental state". A practical method for grading the cognitive state of patients for the clinician. *Journal of psychiatric research*. 1975; **12**: 189-98.
- 21 **Ware JE**, Sherbourne CD. The MOS 36-item short-form health survey (SF-36). I. Conceptual framework and item selection. *Med Care*. 1992; **30**: 473-83.

- 1  
2  
3 22 **Thumboo J**, Fong KY, Machin D, et al. A community-based study of scaling assumptions  
4 and construct validity of the English (UK) and Chinese (HK) SF-36 in Singapore. *Qual Life Res.*  
5 2001; **10**: 175-88.
- 6 23 **Andenaes R**, Kalfoss MH, Wahl AK. Coping and psychological distress in hospitalized  
7 patients with chronic obstructive pulmonary disease. *Heart Lung.* 2006; **35**: 46-57.
- 8 23 **Grant I**, Heaton RK, McSweeney AJ, et al. Neuropsychologic findings in hypoxemic chronic  
9 obstructive pulmonary disease. *Archives of internal medicine.* 1982; **142**: 1470-6.
- 10 24 **Fix AJ**, Golden CJ, Daughton D, et al. Neuropsychological deficits among patients with  
11 chronic obstructive pulmonary disease. *The International journal of neuroscience.* 1982; **16**: 99-  
12 105.
- 13 25 **Klein M**, Gauggel S, Sachs G, et al. Impact of chronic obstructive pulmonary disease  
14 (COPD) on attention functions. *Respiratory medicine.* 2010; **104**: 52-60.
- 15 26 **Cerhan JR**, Folsom AR, Mortimer JA, et al. Correlates of cognitive function in middle-  
16 aged adults. Atherosclerosis Risk in Communities (ARIC) Study Investigators. *Gerontology.* 1998;  
17 **44**: 95-105.
- 18 27 **Anstey KJ**, Windsor TD, Jorm AF, et al. Association of pulmonary function with cognitive  
19 performance in early, middle and late adulthood. *Gerontology.* 2004; **50**: 230-4.
- 20 28 **Sachdev PS**, Anstey KJ, Parslow RA, et al. Pulmonary function, cognitive impairment  
21 and brain atrophy in a middle-aged community sample. *Dementia and geriatric cognitive*  
22 *disorders.* 2006; **21**: 300-8.
- 23 29 **Min JY**, Min KB, Paek D, et al. The association between neurobehavioral performance  
24 and lung function. *Neurotoxicology.* 2007; **28**: 441-4.
- 25 30 **Dohrenwend BP**. Inventorying stressful life events as risk factors for psychopathology:  
26 Toward resolution of the problem of intracategory variability. *Psychological bulletin.* 2006; **132**:  
27 477-95.
- 28 31 **McSweeney AJ**, Grant I, Heaton RK, et al. Life quality of patients with chronic obstructive  
29 pulmonary disease. *Arch Intern Med.* 1982; **142**: 473-8.
- 30 32 **Kim HF**, Kunik ME, Molinari VA, et al. Functional impairment in COPD patients: the  
31 impact of anxiety and depression. *Psychosomatics.* 2000; **41**: 465-71.
- 32 33 **Cully JA**, Graham DP, Stanley MA, et al. Quality of life in patients with chronic obstructive  
33 pulmonary disease and comorbid anxiety or depression. *Psychosomatics.* 2006; **47**: 312-9.
- 34  
35  
36  
37  
38  
39  
40  
41  
42  
43  
44  
45  
46  
47  
48  
49  
50  
51  
52  
53  
54  
55  
56  
57  
58  
59  
60

1  
2  
3  
4 **Life Event Stress and Chronic Obstructive Pulmonary Disease (COPD): Associations with**  
5 **Mental Wellbeing and Quality of Life in a Population-based Study**  
6  
7

8  
9 Running title: Stress & COPD  
10

11  
12 Yanxia Lu<sup>1, 2</sup>, Ma Shwe Zin Nyunt<sup>1, 2</sup>, Gwee Xinyi<sup>1, 2</sup>, Liang Feng<sup>1, 2</sup>, Lei Feng<sup>1, 2</sup>, Ee Heok  
13 Kua<sup>1, 2</sup>, Rajeev Kumar<sup>3</sup>, Tze Pin Ng<sup>1, 2</sup>.  
14

15  
16  
17 <sup>1</sup>Gerontological Research Programme, Yong Loo Lin School of Medicine, National  
18 University of Singapore  
19

20 <sup>2</sup>Department of Psychological Medicine, National University Hospital System, Singapore  
21

22 <sup>3</sup>Academic unit of psychological medicine, Australian National University Medical School,  
23 Canberra, Australia  
24

25  
26 Author responsible for correspondence and request for reprints:  
27

28 A/P Tze-Pin Ng  
29

30 Gerontological Research Programme, National University of Singapore,  
31

32 Department of Psychological Medicine,  
33

34 NUHS Tower Block, 9<sup>th</sup> Floor, 1E Kent Ridge Road, Singapore 119228  
35

36 Fax: 65-67772191, Tel: 65-67723478 Email: [pcmngtp@nus.edu.sg](mailto:pcmngtp@nus.edu.sg)  
37

38 The study was supported by a research grant (No. 03/1/21/17/214) from the Biomedical  
39 Research Council, Agency for Science, Technology and Research (ASTAR).  
40

41 Word count  
42

43 Text: 2645 words  
44

45 Abstract: 199 words  
46

47 Tables: 2  
48

49 Figure: 1  
50

51 **Key Words:** Life event stress; COPD; Cognitive function; Physical and psychological well-  
52 being; Quality of life  
53  
54  
55  
56  
57  
58  
59  
60

## ARTICAL SUMMARY

### Article focus

- The impact of life event stress on the mental wellbeing and quality of life of individuals with chronic obstructive pulmonary disease (COPD).

### Key messages

- Our findings showed that in individuals with COPD, life event stress **had a greater detrimental effect on mental health and quality of life in comparison to non-COPD individuals.**

### Strengths and limitations of this study

- The case definition for COPD in this study was accurately based on symptom and post-bronchial dilatation spirometric measures of chronic airflow obstruction that are diagnostic of COPD according to GOLD recommended criteria.
- The results from this general population-based study are largely free of clinical selection bias, and also controlled for important confounding by demographic and psychosocial variables in the analysis.
- Definite causal inferences cannot be made from the cross-sectional findings in this study. Further longitudinal studies are required.

## Abstract

**Objectives:** To investigate whether life event stress was associated with greater psychological distress and poorer quality of life in older individuals with COPD, in comparison to their counterparts without COPD

**Design:** Cross-sectional study.

**Participants:** A population-based sample (N=497) of individuals aged 65 and above with COPD (post-bronchodilatation FEV<sub>1</sub>/FVC<0.70, N=136) and without COPD (N=277).

**Measurements:** We measured life event stress, depressive symptoms (GDS), cognitive symptoms and function (CFQ, MMSE), and physical and mental health functional status (SF36-PCS and SF36-MCS) in participants with and without COPD.

**Results:** In two-way analysis of variance controlling for potential confounders, life event stress was associated with significant main effects of worse GDS ( $p<0.001$ ), SF36-PCS ( $p=0.008$ ) and SF36-MCS scores ( $p<0.001$ ), and with significant interaction effects on GDS score ( $p<0.001$ ), SF36-PCS ( $p=0.045$ ) and SF36-MCS ( $p=0.034$ ) in participants with COPD more than in non-COPD participants. Main effect of COPD was found for post-bronchodilator FEV<sub>1</sub> ( $p<0.001$ ) and cognitive symptoms ( $p=0.02$ ).

**Conclusions:** Our findings indicate that life event stress was associated with more depressive symptoms and worse quality of life in individuals with COPD, much more than in those without COPD. Further studies should explore the role of cognitive appraisal of stress, coping resources and psycho-social support in this relationship.

## INTRODUCTION

Chronic obstructive pulmonary disease (COPD) stands out among chronic diseases with its high and rising prevalence and mortality [1], poor quality of life, frequent hospitalization and huge societal burden of care [2]. Because patients with COPD bear a heavy burden of psychological disturbance, psychiatric morbidity, and disability in daily living activities [3, 4], the mental health of COPD patients has received growing attention in recent years.

Life event stress is increasingly recognized to play important roles in the development and outcomes of chronic illness such as type II diabetes, coronary heart disease, gastroenterological disorders and obstetric outcomes [5]. Stress is well known to result in depression, psychological burnout, post-traumatic stress disorder (PTSD) in all ages, as well as cognitive impairment in late life [6]. Among COPD patients, an intrinsic source of stress is directly related to their illness, involving the experience of anxiety and distress provoked by breathing difficulties [7, 8], including muddled thoughts, heightened emotions, extreme fear and panic and decreased physical energy, and various difficulties in emotional functioning, sleep and rest, physical mobility, social interaction, activities of daily living, recreation, work and finance. However, the impact of life event stress in general including those extrinsic to illness-related experience on the physical and mental functioning and quality of life of individuals with COPD in comparison to non-COPD individuals has rarely been investigated [9, 10, 6]. The aim of this study was to investigate whether life event stress was associated with greater psychological distress and poorer quality of life in older individuals with COPD, in comparison to their counterparts without COPD.

The present study analyzed data collected on COPD status, life event stress, and measures of pulmonary function, cognitive function, depressive symptoms and quality of in a population-based sample (Singapore Longitudinal Aging Study) [11] to



1  
2  
3 investigate the effect of life event stress on psychological functioning and quality of life.  
4  
5 We hypothesized that life event stress in the whole sample would be associated with  
6  
7 depressive symptoms and poor quality of life (main effect), but would have a stronger  
8  
9 association among individuals with COPD than among non-COPD individuals  
10  
11 (interaction), suggesting a greater detrimental effect on depressive symptoms and  
12  
13 quality of life. A secondary relationship analyzed in two-way analysis of variance (ANOVA)  
14  
15 was the main effect of COPD status (and its interaction with life event stress) on  
16  
17 primary outcomes of pulmonary and cognitive function, based on the known effects of  
18  
19 impaired pulmonary and cognitive function in COPD.  
20  
21  
22  
23  
24

## 25 **METHODS**

### 26 **Study Design and Participants**

27  
28  
29 The participants in the study were a subsample recruited from one locality (Bukit  
30  
31 Merah) in the South Central region of Singapore Longitudinal Aging Study (SLAS-2), a  
32  
33 prospective population-based cohort study of aging and health of community-dwelling  
34  
35 elderly [12]. We interviewed one participant from each household who were  
36  
37 Singaporean citizens or permanent residents aged 65 or older who were able to give  
38  
39 informed consent. Those who were too frail or ill and unable to complete the interview,  
40  
41 for reasons such as from post-stroke aphasia, cachexia or profound dementia, were  
42  
43 excluded. The participants who completed interviews and provided technically  
44  
45 acceptable spirometric data (N=497) represented a response rate of 78.5% of the  
46  
47 eligible participants. All participants signed written informed consent for the study  
48  
49 which was approved by the National University of Singapore Institutional Review Board.  
50  
51  
52

### 53 **COPD**

54  
55 We identified cases of COPD among the participants who had characteristic  
56  
57 symptoms of COPD and spirometric evidence of chronic airflow obstruction (post-  
58  
59  
60

1  
2  
3 bronchial dilatation  $FEV_1/FVC < 0.70$ ), in accordance with the definition recommended  
4  
5 by the Global Initiative for Chronic Obstructive Lung Disease (GOLD) [13].  
6

7 Questions from the British Medical Research Council Questionnaire on chronic  
8  
9 respiratory symptoms were used to elicit symptoms characteristic of COPD: chronic  
10  
11 cough and/or sputum lasting at least 3 months in the year and/or breathlessness on  
12  
13 exertion.  
14

15  
16 Ventilatory function testing was performed using a portable, battery operated,  
17  
18 ultrasound transit-time based spirometer (Easy-One; Model 2001 Diagnostic Spirometer,  
19  
20 NDD Medical Technologies, Zurich, Switzerland). Calibration was checked daily with a 3-  
21  
22 L syringe. Forced expiratory maneuvers were performed with the respondent seated  
23  
24 with recommended guidelines and standardization of procedures: at least three  
25  
26 acceptable maneuvers, with forced vital capacity (FVC) and forced expiratory volume in  
27  
28 the first second ( $FEV_1$ ) reproducible within 200 ml. Chronic airflow obstruction as  
29  
30 defined as post-bronchial dilatation  $FEV_1/FVC < 0.70$ .  
31  
32

### 33 **Life Event Stress**

34  
35 Life event stress was measured by an 11-item life events inventory [14, 15] that  
36  
37 excluded personal illness experiences directly related to COPD. The participants were  
38  
39 asked to indicate yes or no as to whether any of eleven life events had occurred over  
40  
41 the past year ("spouse or partner die, a close friend or family member die or have a  
42  
43 serious illness (other than your spouse or partner), major problems with money, a  
44  
45 divorce or breakup, family member or close friend have a divorce or breakup, major  
46  
47 conflict with children or grandchildren, major accidents, disasters, muggings, unwanted  
48  
49 sexual experiences, robberies, or similar events, a family member or close friend lose  
50  
51 their job or retire, physically abused, verbally abused, or pet die"). If the participant  
52  
53 indicated (a) life event(s) had occurred, he/she was asked to appraise the event and  
54  
55 indicate on a scale of 1 (did not upset me) to 3 (upset me greatly) the extent it upset  
56  
57  
58  
59  
60

1  
2  
3 them. **Frequency of life event stress was calculated.** The scale also provides a life event  
4 stress score **appraised by the participant** that ranged from 0 to 33 with a higher score  
5 indicating a participant experienced a greater number of more stressful events.  
6  
7

### 8 9 **Depressive Symptoms**

10  
11 The presence of depressive symptoms was determined **by a depression screening**  
12 **scale for elderly populations,** the 15-item Geriatric Depression Scale (GDS-15) with  
13 scores ranging from 0 to 15 [16]. The GDS was well suited for the study because it is  
14 largely free of the measurement artefact due to overlapping somatic symptoms of  
15 physical illness(es) and depression. **In validation studies in the local older population**  
16 **[17], translated versions of the GDS-15 have been found to be a valid and reliable**  
17 **screening tool for depression: Cronbach's alpha of 0.80, and intraclass coefficients of**  
18 **test-retest reliability of 0.83 and inter-rater reliability of 0.94. Using a GDS cutoff of >=5,**  
19 **the GDS-15 has a sensitivity of 0.97 and specificity of 0.95 (area under curve of 0.98)**  
20 **for determining major depressive disorder according to DSM-IV criteria. Depressive**  
21 **symptoms defined as such by GDS>=5 is clinically significant, and such cases including**  
22 **"sub-threshold" depression, had been shown in the same population to be associated**  
23 **with significantly poorer mental and physical health and functional status, and more**  
24 **healthcare resource utilization compared to non-cases and were similar to or worse**  
25 **than syndrome threshold cases of depression [18].**  
26  
27  
28  
29  
30  
31  
32  
33  
34  
35  
36  
37  
38  
39  
40  
41  
42  
43

### 44 **Cognitive Function**

45  
46 Cognitive function was measured using the Cognitive Failures Questionnaire (CFQ)  
47 [19] and the Mini-Mental State Examination (MMSE) which **were** validated and widely  
48 used instruments to assess global cognitive functioning [20]. The CFQ uses a 5-point  
49 Likert-type scale (1 = Never, 5 = Very often) to evaluate self-reported cognitive problems  
50 (e.g., "Do you need to re-read instructions several times?"). Higher CFQ scores indicate  
51 more frequent cognitive problems and higher MMSE scores (0 to 30) indicate better  
52  
53  
54  
55  
56  
57  
58  
59  
60

1  
2  
3 global cognitive functioning, and MMSE scores of 23 or less are considered to be  
4  
5 cognitively impaired.  
6

### 7 **Physical and Mental Functioning**

8  
9 Physical and mental functional well-being was measured by the Medical Outcomes  
10 Study 36-item Short Form (SF-36) [21] which has been previously validated for use in  
11 Singaporeans [22]. Weighted summary measures of Physical Health Component  
12 Summary (PCS) score and Mental Health Component Summary (MCS) score were  
13  
14 computed with higher scores indicating better physical and mental health functioning  
15  
16 and quality of life.  
17  
18  
19  
20  
21

### 22 **Statistical Analyses**

23  
24 Data analysis was performed using the software package PASW Statistics version  
25  
26 18. In preliminary univariate analysis, participants with and without COPD were  
27 compared with respect to differences in number of life events, and perceived stress  
28 score, level of FEV1, CFQ, MMSE, GDS depression, SF-36 PCS and SF-36 MCS scores, as  
29 well as potential confounding variables, sex, age, ethnicity, smoking status, number of  
30 chronic diseases, using t-tests or chi-squared tests of significance. The independent  
31 main effects of life event stress and COPD (independent variables) as well as the  
32 interaction effects of life event stress and COPD on measures of pulmonary function,  
33 depressive symptoms, cognitive function, and quality of life (dependent variables) were  
34 analyzed using two-way analysis of variance (ANOVA) and general linear model which  
35 adjusted for sex, age, ethnicity, smoking status, and number of chronic illness. The  
36 independent variable of primary interest was life event stress, and the primary outcome  
37 variables of interest were depressive symptoms and quality of life. A secondary  
38 relationship analyzed in the two-way ANOVA model was the main effect of COPD status  
39 (and its interaction with life event stress) on primary outcomes of pulmonary and  
40 cognitive function. For the outcome variables with significant interaction of life event  
41  
42  
43  
44  
45  
46  
47  
48  
49  
50  
51  
52  
53  
54  
55  
56  
57  
58  
59  
60

1  
2  
3 stress and COPD, the simple effects of their relationships with life event stress score  
4  
5 were investigated respectively in participants with and without COPD. Statistical  
6  
7 significance was set at  $p < 0.05$ .  
8  
9

## 11 RESULTS

12  
13  
14 This study consisted of 497 participants with the average age of 72.1. Among the  
15  
16 respondents, 32.9% had COPD, and 67.1% had no COPD. The proportion of respondents  
17  
18 with stressful life events in the past one year was 43.4%. The socio-demographic and  
19  
20 psychological characteristics of study participants with and without COPD are shown in  
21  
22 Table 1. Participants with COPD were found to have higher mean age ( $t=3.328$ ,  
23  
24  $p=0.001$ ), higher proportion of smokers ( $\chi^2 = 20.586$ ,  $df=3$ ,  $p < 0.001$ ) and increased  
25  
26 number of diseases ( $t=7.096$ ,  $p < 0.001$ ). No significant difference in the number of life  
27  
28 events or perceived stress was observed between COPD and non-COPD participants  
29  
30 ( $p > 0.05$ ).  
31  
32

33  
34 Table 1 shows that compared with those without COPD, participants with COPD  
35  
36 had decreased post-bronchodilator FEV1 ( $t=6.185$ ,  $p < 0.001$ ), MMSE score ( $t=3.090$ ,  
37  
38  $p=0.002$ ) and SF-36 PCS ( $t=2.726$ ,  $p=0.007$ ) score. There were no difference in CFQ  
39  
40 and GDS depression scores between participants with and without COPD ( $p > 0.05$ ) in  
41  
42 the whole sample. Next, we evaluated the effect of life event stress on GDS, CFQ, MMSE,  
43  
44 SF-36 PCS and SF-36 MCS scores by subgroups of participants with COPD and without  
45  
46 COPD. As shown in Table 2, two-way analysis of variance in general linear model  
47  
48 showed significant main effects of life event stress for GDS ( $F=64.500$ ,  $df=1$ ,  $p < 0.001$ ),  
49  
50 SF36-PCS ( $F=7.054$ ,  $df=1$ ,  $p=0.008$ ) and SF36-MCS ( $F=14.710$ ,  $df=1$ ,  $p < 0.001$ ) scores,  
51  
52 and significant interactions of life event stress with COPD were found as well for GDS  
53  
54 ( $F=10.970$ ,  $df=1$ ,  $p=0.001$ ), SF36-PCS ( $F=4.055$ ,  $df=1$ ,  $p=0.045$ ), and SF36-MCS  
55  
56 ( $F=4.538$ ,  $df=1$ ,  $p=0.034$ ) scores. The simple effects of life event stress on GDS, SF36-  
57  
58  
59  
60

PCS and SF36-MCS are shown for participants with and without COPD respectively in Figure 1. Increasing stress score was associated with higher GDS score, lower SF12-PCS and lower SF12-MCS scores in participants with COPD, more than in those without COPD after adjusting for potential confounders, indicating the association of life event stress with worse psychological distress and poorer quality of life among individuals with COPD, in comparison to non-COPD individuals. The other significant main effect found in two-way analysis of variance was of COPD for decreased post-bronchodilator FEV<sub>1</sub> ( $F=17.458$ ,  $df=1$ ,  $p<0.001$ ) and higher CFQ scores ( $F=5.424$ ,  $df=1$ ,  $p=0.020$ ) after adjustment of sex, age, ethnicity, smoking status, and number of chronic illness, indicating impaired pulmonary and cognitive functions in participants with COPD.

**Table 1. Socio-demographic, pulmonary and psychological variables of study participants aged 65 or older (Singapore Longitudinal Aging Study, SLAS)**

|                                           | COPD  |            | Non-COPD |            | Significant Test        | p      |
|-------------------------------------------|-------|------------|----------|------------|-------------------------|--------|
|                                           | N     | %          | N        | %          |                         |        |
| Total                                     | 136   | 32.9       | 277      | 67.1       |                         |        |
| Sex                                       |       |            |          |            |                         |        |
| Male                                      | 58    | 42.6       | 112      | 40.7       | $\chi^2=0.138$ , $df=1$ | 0.710  |
| Female                                    | 78    | 57.4       | 163      | 59.3       |                         |        |
| Age (years, M $\pm$ SD)                   | 73.19 | $\pm 5.87$ | 71.23    | $\pm 5.47$ | $t=3.328$               | 0.001  |
| Ethnicity                                 |       |            |          |            |                         |        |
| Chinese                                   | 121   | 89.0       | 241      | 87.6       | $\chi^2=0.154$ , $df=1$ | 0.694  |
| Non-Chinese                               | 15    | 11.0       | 34       | 12.4       |                         |        |
| Smoking                                   |       |            |          |            |                         |        |
| Never smoker                              | 77    | 57.6       | 211      | 77.3       | $\chi^2=20.59$ , $df=3$ | <0.001 |
| Past smoker                               | 29    | 21.6       | 41       | 15.0       |                         |        |
| Current smoker < 10 cigarettes daily      | 18    | 13.4       | 12       | 4.4        |                         |        |
| Current smoker $\geq$ 10 cigarettes daily | 10    | 7.5        | 9        | 3.3        |                         |        |
| Number of chronic diseases                | 2.60  | $\pm 1.30$ | 1.65     | 1.25       | $t=7.096$               | <0.001 |
| Number of Negative Life Events            | 0.67  | $\pm 0.98$ | 0.74     | $\pm 1.11$ | $t=0.609$               | 0.543  |
| Life Event Stress Score                   | 1.02  | $\pm 1.71$ | 1.12     | $\pm 1.78$ | $t=0.525$               | 0.600  |
| Post-bronchodilator FEV <sub>1</sub>      | 1.42  | $\pm 0.50$ | 1.75     | $\pm 0.52$ | $t=6.185$               | <0.001 |
| CFQ Score                                 | 38.0  | $\pm 9.21$ | 38.8     | $\pm 9.83$ | $t=0.733$               | 0.464  |
| MMSE Score                                | 26.4  | $\pm 3.26$ | 27.4     | $\pm 3.11$ | $t=3.090$               | 0.002  |
| GDS Depression score                      | 1.13  | $\pm 2.04$ | 0.84     | $\pm 1.69$ | $t=1.487$               | 0.138  |
| GDS $\geq 5$ , % (n)                      | 5.2   | (7)        | 2.9      | (8)        | $\chi^2=1.349$ , $df=1$ | 0.245  |
| SF-36 PCS                                 | 44.6  | $\pm 9.04$ | 47.1     | $\pm 7.21$ | $t=2.726$               | 0.007  |
| SF-36 MCS                                 | 54.9  | $\pm 7.83$ | 55.1     | $\pm 6.68$ | $t=0.353$               | 0.724  |

1  
2  
3 **Figures in table denote mean  $\pm$  SD or number and %.**  
4 **Smoker is defined as smoking  $\geq$  10 cigarettes daily**  
5  
6  
7  
8  
9  
10  
11  
12  
13  
14  
15  
16  
17  
18  
19  
20  
21  
22  
23  
24  
25  
26  
27  
28  
29  
30  
31  
32  
33  
34  
35  
36  
37  
38  
39  
40  
41  
42  
43  
44  
45  
46  
47  
48  
49  
50  
51  
52  
53  
54  
55  
56  
57  
58  
59  
60

For peer review only

**Table 2. Two-way ANOVA: Life event stress, COPD and mental and physical variables**

|                          | Main Effects of COPD (df=1) |        | Main Effects of Stress (df=1) |        | Interaction (df=1) |       |
|--------------------------|-----------------------------|--------|-------------------------------|--------|--------------------|-------|
|                          | F                           | P      | F                             | P      | F                  | p     |
| Post-bronchodilator FEV1 | 17.458                      | <0.001 | 0.323                         | 0.570  | 2.057              | 0.152 |
| CFQ Score                | 5.424                       | 0.020  | 1.927                         | 0.166  | 2.514              | 0.114 |
| MMSE Score               | 1.799                       | 0.181  | 1.159                         | 0.282  | 0.380              | 0.538 |
| GDS Depression score     | 2.353                       | 0.126  | 64.500                        | <0.001 | 10.970             | 0.001 |
| SF-36 PCS                | 0.432                       | 0.512  | 7.054                         | 0.008  | 4.055              | 0.045 |
| SF-36 MCS                | 0.659                       | 0.417  | 14.710                        | <0.001 | 4.538              | 0.034 |

Adjusted variables: sex, age, ethnicity, smoking status, and number of chronic illness. FEV1=Forced Expiratory Volume in the first second; CFQ=Cognitive Failure Questionnaire; MMSE=Mini-Mental State Examination; GDS=the Geriatric Depression Scale; SF-36=36-Item Short-Form Healthy Survey; PCS=Physical Health Component Summary; MCS= Mental Health Component Summary.

## DISCUSSION

The principal finding in this study indicated that life event stress was **associated with depressive symptoms and poor quality of life** in both COPD and non-COPD participants (main effects), but showed a significantly stronger association **among individuals with COPD than among non-COPD individuals (interaction), suggesting a disproportionately greater detrimental effect**. To our knowledge, no other studies have reported demonstrating this relationship.

It should be noted that **participants with COPD** actually did not report greater **frequency of occurrence or perceived stress score of non-illness related life events** than non-COPD participants. Instead, individuals with COPD appeared to experience the same number of non-illness related life events and perceived them to be equally stressful as their non-COPD counterparts, yet showed disproportionately greater psychological distress and poorer quality of life. These results suggest that individuals with COPD may be more vulnerable to the adverse impact of stressful events than non-COPD individuals.



1  
2  
3 A greater detrimental effect of life event stress on psychological wellbeing and  
4 quality of life in COPD individuals may hypothetically be explained by the possibility that  
5 COPD individuals perceive and appraise stressful life events differently to individuals  
6 without COPD, or that COPD individuals have poorer coping skills or fewer social and  
7 economic resources, or both. We did not have measures of cognitive appraisal, coping  
8 resources and social support to explore these hypotheses directly, and this is a  
9 limitation of our study.  
10  
11

12  
13  
14  
15  
16  
17  
18 There are few studies that have investigated the relationship between cognitive  
19 appraisal of stressful events, coping strategies and psychological distress in COPD  
20 patients. A study by Andrenas and co-investigators [23] have assessed how hospitalized  
21 patients with acutely exacerbated COPD appraised and coped with a recent stressful  
22 event and their level of psychological distress. They reported that half of the  
23 respondents tended to perceive their stressful event as representing a threat, 26% as  
24 harmful, 7.6% as a loss, 4.3% as a challenge, and 11% characterized the stressful event  
25 in some other ways. However, the authors found that neither types of stressful event,  
26 stress intensity, primary or secondary appraisal, or number of coping strategies used  
27 were significantly related to psychological distress. Only problem-solving coping  
28 strategies were inversely related to psychological distress. This suggests that poor  
29 coping skills may be the principal psychological problem among COPD patients that  
30 contribute to their psychological distress and poor quality of life. However, further  
31 studies should be conducted.  
32  
33  
34  
35  
36  
37  
38  
39  
40  
41  
42  
43  
44  
45  
46  
47  
48

49 Our secondary finding of the main effects of COPD on FEV<sub>1</sub> was expected and thus  
50 not surprising. However, the association of COPD with more frequent cognitive  
51 problems was interesting, although the results for MMSE score were not significant  
52 after adjustment in two-way ANOVA, possibly due to sample size limitation. These  
53 results are consistent with clinical and population studies that indicate significant  
54  
55  
56  
57  
58  
59  
60

1  
2  
3 cognitive effects of COPD on deficits in abstract reasoning [23], complex visual motor  
4 process [24], and verbal learning [25], language [26], attention [27], information  
5 processing speed [27-29] and verbal learning and memory [28, 29].  
6  
7

8  
9  
10 The present study has strengths and limitations. The case definition for COPD is  
11 accurately based on symptom and post-bronchial dilatation spirometric measures of  
12 chronic airflow obstruction that are diagnostic of COPD according to GOLD  
13 recommended criteria. Results from this general population-based study are largely  
14 free of clinical selection bias, and also controlled for important confounding by  
15 demographic and psychosocial variables in the analysis. The measure of life event  
16 stress is modified to exclude illness-related stress from chronic diseases in this older  
17 population. However, a limitation of the life event inventory is inter-categorical variability  
18 and recall bias in the appraisal of the stressful life event [30]. In a cross-sectional study,  
19 interpreting the causal relationship between stress and the health-related functional  
20 outcomes can be uncertain. Further longitudinal studies are required.  
21  
22  
23  
24  
25  
26  
27  
28  
29  
30  
31  
32

33  
34 Studies [31-33] have reported that mental health status, including anxiety and  
35 depressive symptoms, are better predictors of COPD-related quality of life than  
36 pulmonary function. The present study supports this observation and further indicates  
37 that life event stress has a starkly detrimental effect on mental health and quality of life  
38 in patients with COPD. While it is increasingly being recognized that the identification  
39 and treatment of psychological disorders are important for improving patient centered  
40 outcomes in COPD patients, there should be commensurate attention to stressful life  
41 event(s) that trigger psychological disturbances and poor psycho-social functioning.  
42 Psychological interventions in COPD patients that include the identification of stressful  
43 life event and improving patients' coping skills may directly contribute to improving  
44 psychological functioning and quality of life in COPD patients.  
45  
46  
47  
48  
49  
50  
51  
52  
53  
54  
55  
56

57  
58 In conclusion, the present study found that life event stress was associated with  
59  
60

1  
2  
3 more depressive symptoms and worse quality of life in individuals with COPD, much  
4  
5 more than in those without COPD. Further studies should explore the role of cognitive  
6  
7 appraisal of stress, coping resources and psycho-social support in this relationship.  
8  
9

## 10 11 **ACKNOWLEDGEMENTS**

12  
13 The authors thank the following voluntary welfare organizations for their support of the  
14  
15 Singapore Longitudinal Ageing Studies: Geylang East Home for the Aged, Presbyterian  
16  
17 Community Services, Thye Hua Kwan Moral Society (Moral Neighbourhood Links),  
18  
19 Yuhua Neighbourhood Link, Henderson Senior Citizens' Home, NTUC Eldercare Co-op  
20  
21 Ltd, Thong Kheng Seniors Activity Centre (Queenstown Centre) and Redhill Moral  
22  
23 Seniors Activity Centre.  
24  
25  
26

27  
28  
29 The study is supported by a research grant (No. 03/1/21/17/214) from the Biomedical  
30  
31 Research Council, Agency for Science, Technology and Research (ASTAR).  
32  
33

## 34 35 **DECLARATION OF INTEREST**

36  
37 The authors declare that there are no declarations of interest in relation to the current  
38  
39 study. The authors are responsible for the writing and the content of this article.  
40  
41  
42

## 43 44 **DATA SHARING STATEMENT**

45  
46 There is no additional data available.  
47  
48  
49  
50  
51  
52  
53  
54  
55  
56  
57  
58  
59  
60

## References

- 1 **Jemal A**, Ward E, Hao Y, et al. Trends in the leading causes of death in the United States, 1970-2002. *JAMA : the journal of the American Medical Association*. 2005; **294**: 1255-9.
- 2 **Murray CJ**, Lopez AD. Global mortality, disability, and the contribution of risk factors: Global Burden of Disease Study. *Lancet*. 1997; **349**: 1436-42.
- 3 **Zhang MWB**, Ho RCM, Cheung MWL, et al. Prevalence of depressive symptoms in patients with chronic obstructive pulmonary disease: a systematic review, meta-analysis and meta-regression. *General hospital psychiatry*. 2011; **33**: 217-23.
- 4 **Eisner MD**, Blanc PD, Yelin EH, et al. Influence of anxiety on health outcomes in COPD. *Thorax*. 2010; **65**: 229-34.
- 5 **Repetti RL**, Taylor SE, Seeman TE. Risky families: family social environments and the mental and physical health of offspring. *Psychol Bull*. 2002; **128**: 330-66.
- 6 **Marin MF**, Lord C, Andrews J, et al. Chronic stress, cognitive functioning and mental health. *Neurobiol Learn Mem*. 2011; **96**: 583-95.
- 7 **DeVito AJ**. Dyspnea during hospitalizations for acute phase of illness as recalled by patients with chronic obstructive pulmonary disease. *Heart Lung*. 1990; **19**: 186-91.
- 8 **Gurney-Smith B**, Cooper MJ, Wallace LM. Anxiety and Panic in Chronic Obstructive Pulmonary Disease: The Role of Catastrophic Thoughts. *Cognitive Therapy and Research*. 2002; **26**: 143-55.
- 9 **Guelli N**, Verrusio W, Linguanti A, et al. Montelukast therapy and psychological distress in chronic obstructive pulmonary disease (COPD): a preliminary report. *Archives of gerontology and geriatrics*. 2011; **52**: e36-9.
- 10 **Colby JP**, Linsky AS, Straus MA. Social stress and state-to-state differences in smoking and smoking related mortality in the United States. *Soc Sci Med*. 1994; **38**: 373-81.
- 11 **Ng TP**, Broekman BFP, Niti M, et al. Determinants of Successful Aging Using a Multidimensional Definition Among Chinese Elderly in Singapore. *American Journal of Geriatric Psychiatry*. 2009; **17**: 407-16.
- 12 **Niti M**, Ng TP, Kua EH, et al. Depression and chronic medical illnesses in Asian older adults: the role of subjective health and functional status. *Int J Geriatr Psychiatry*. 2007; **22**: 1087-94.
- 13 **Global Initiative for Chronic Obstructive Lung Disease**. Global strategy for the diagnosis, management and prevention of chronic obstructive pulmonary disease. Executive summary. *NHLBI/WHO workshop report*. 2001.
- 14 **Andenaes R**, Moum T, Kalfoss MH, et al. Changes in health status, psychological distress, and quality of life in COPD patients after hospitalization. *Qual Life Res*. 2006; **15**: 249-57.
- 15 **Andenaes R**. Psychological characteristics of patients with chronic obstructive pulmonary disease: a review. *J Psychosom Res*. 2005; **59**: 427-8.
- 16 **Yesavage JA**, Brink TL, Rose TL, et al. Development and validation of a geriatric depression screening scale: a preliminary report. *Journal of psychiatric research*. 1982; **17**: 37-49.
- 17 **Nyunt MSZ**, Fones C, Niti M, et al. Criterion-based validity and reliability of the Geriatric Depression Screening Scale (GDS-15) in a large validation sample of community-living Asian older adults. *Aging Ment Health*. 2009; **13**: 376-82.
- 18 **Soh KC**, Kumar R, Niti M, et al. Subsyndromal depression in old age: clinical significance and impact. *Int Psychogeriatr*. 2008; **20**: 188-200.
- 19 **Broadbent DE**, Cooper PF, FitzGerald P, et al. The Cognitive Failures Questionnaire (CFQ) and its correlates. *Br J Clin Psychol*. 1982; **21 (Pt 1)**: 1-16.
- 20 **Folstein MF**, Folstein SE, McHugh PR. "Mini-mental state". A practical method for grading the cognitive state of patients for the clinician. *Journal of psychiatric research*. 1975; **12**: 189-98.
- 21 **Ware JE**, Sherbourne CD. The MOS 36-item short-form health survey (SF-36). I. Conceptual framework and item selection. *Med Care*. 1992; **30**: 473-83.

- 1  
2  
3 22 **Thumboo J**, Fong KY, Machin D, et al. A community-based study of scaling assumptions  
4 and construct validity of the English (UK) and Chinese (HK) SF-36 in Singapore. *Qual Life Res.*  
5 2001; **10**: 175-88.
- 6 23 **Andenaes R**, Kalfoss MH, Wahl AK. Coping and psychological distress in hospitalized  
7 patients with chronic obstructive pulmonary disease. *Heart Lung.* 2006; **35**: 46-57.
- 8 23 **Grant I**, Heaton RK, McSweeney AJ, et al. Neuropsychologic findings in hypoxemic chronic  
9 obstructive pulmonary disease. *Archives of internal medicine.* 1982; **142**: 1470-6.
- 10 24 **Fix AJ**, Golden CJ, Daughton D, et al. Neuropsychological deficits among patients with  
11 chronic obstructive pulmonary disease. *The International journal of neuroscience.* 1982; **16**: 99-  
12 105.
- 13 25 **Klein M**, Gauggel S, Sachs G, et al. Impact of chronic obstructive pulmonary disease  
14 (COPD) on attention functions. *Respiratory medicine.* 2010; **104**: 52-60.
- 15 26 **Cerhan JR**, Folsom AR, Mortimer JA, et al. Correlates of cognitive function in middle-  
16 aged adults. Atherosclerosis Risk in Communities (ARIC) Study Investigators. *Gerontology.* 1998;  
17 **44**: 95-105.
- 18 27 **Anstey KJ**, Windsor TD, Jorm AF, et al. Association of pulmonary function with cognitive  
19 performance in early, middle and late adulthood. *Gerontology.* 2004; **50**: 230-4.
- 20 28 **Sachdev PS**, Anstey KJ, Parslow RA, et al. Pulmonary function, cognitive impairment  
21 and brain atrophy in a middle-aged community sample. *Dementia and geriatric cognitive*  
22 *disorders.* 2006; **21**: 300-8.
- 23 29 **Min JY**, Min KB, Paek D, et al. The association between neurobehavioral performance  
24 and lung function. *Neurotoxicology.* 2007; **28**: 441-4.
- 25 30 **Dohrenwend BP**. Inventorying stressful life events as risk factors for psychopathology:  
26 Toward resolution of the problem of intracategory variability. *Psychological bulletin.* 2006; **132**:  
27 477-95.
- 28 31 **McSweeney AJ**, Grant I, Heaton RK, et al. Life quality of patients with chronic obstructive  
29 pulmonary disease. *Arch Intern Med.* 1982; **142**: 473-8.
- 30 32 **Kim HF**, Kunik ME, Molinari VA, et al. Functional impairment in COPD patients: the  
31 impact of anxiety and depression. *Psychosomatics.* 2000; **41**: 465-71.
- 32 33 **Cully JA**, Graham DP, Stanley MA, et al. Quality of life in patients with chronic obstructive  
33 pulmonary disease and comorbid anxiety or depression. *Psychosomatics.* 2006; **47**: 312-9.
- 34  
35  
36  
37  
38  
39  
40  
41  
42  
43  
44  
45  
46  
47  
48  
49  
50  
51  
52  
53  
54  
55  
56  
57  
58  
59  
60



**Figure 1. Predicted value for SF-36 PCS, GDS depression score and SF 36-MCS in participants with and without COPD**

SF-36=36-Item Short-Form Healthy Survey; PCS=Physical Health Component Summary; GDS=the Geriatric Depression Scale; MCS= Mental Health Component Summary.

1  
2  
3  
4  
5  
6  
7  
8  
9  
10  
11  
12  
13  
14  
15  
16  
17  
18  
19  
20  
21  
22  
23  
24  
25  
26  
27  
28  
29  
30  
31  
32  
33  
34  
35  
36  
37  
38  
39  
40  
41  
42  
43

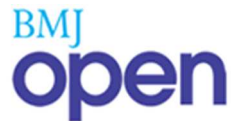

**Life Event Stress and Chronic Obstructive Pulmonary Disease (COPD): Associations with Mental Wellbeing and Quality of Life in a Population-based Study**

|                                                                                                                                                                                                                             |                                                                                                                                                                                                                                                                                                                                                                                                                                                                                                                                                                                                                                                                                                                       |
|-----------------------------------------------------------------------------------------------------------------------------------------------------------------------------------------------------------------------------|-----------------------------------------------------------------------------------------------------------------------------------------------------------------------------------------------------------------------------------------------------------------------------------------------------------------------------------------------------------------------------------------------------------------------------------------------------------------------------------------------------------------------------------------------------------------------------------------------------------------------------------------------------------------------------------------------------------------------|
| Journal:                                                                                                                                                                                                                    | <i>BMJ Open</i>                                                                                                                                                                                                                                                                                                                                                                                                                                                                                                                                                                                                                                                                                                       |
| Manuscript ID:                                                                                                                                                                                                              | bmjopen-2012-001674.R2                                                                                                                                                                                                                                                                                                                                                                                                                                                                                                                                                                                                                                                                                                |
| Article Type:                                                                                                                                                                                                               | Research                                                                                                                                                                                                                                                                                                                                                                                                                                                                                                                                                                                                                                                                                                              |
| Date Submitted by the Author:                                                                                                                                                                                               | 16-Oct-2012                                                                                                                                                                                                                                                                                                                                                                                                                                                                                                                                                                                                                                                                                                           |
| Complete List of Authors:                                                                                                                                                                                                   | Lu, Yanxia; National University of Singapore, Department of Psychological Medicine<br>Nyunt, Ma Shwe; National University Hospital System, Gerontological Research Programme<br>Gwee, Xinyi; National University of Singapore, Department of Psychological Medicine<br>Feng, Liang; National University Hospital System, Gerontological Research Programme<br>Feng, Lei; National University of Singapore, Department of Psychological Medicine<br>Kua, Ee Heok; National University of Singapore, Department of Psychological Medicine<br>Kumar, Rajeev; Australian National University Medical School, Academic unit of psychological medicine<br>Ng, Tze Pin; National University Hospital, Psychological Medicine |
| <b>Primary Subject Heading</b>:                                                                                                                                                                                             | Mental health                                                                                                                                                                                                                                                                                                                                                                                                                                                                                                                                                                                                                                                                                                         |
| Secondary Subject Heading:                                                                                                                                                                                                  | Epidemiology, Respiratory medicine                                                                                                                                                                                                                                                                                                                                                                                                                                                                                                                                                                                                                                                                                    |
| Keywords:                                                                                                                                                                                                                   | MENTAL HEALTH, PSYCHIATRY, RESPIRATORY MEDICINE (see Thoracic Medicine)                                                                                                                                                                                                                                                                                                                                                                                                                                                                                                                                                                                                                                               |
| <p>Note: The following files were submitted by the author for peer review, but cannot be converted to PDF. You must view these files (e.g. movies) online.</p> <p>STROBE_checklist_BMJ-Open_cross-sectional-studies.doc</p> |                                                                                                                                                                                                                                                                                                                                                                                                                                                                                                                                                                                                                                                                                                                       |

SCHOLARONE™  
Manuscripts

1  
2  
3  
4 **Life Event Stress and Chronic Obstructive Pulmonary Disease (COPD): Associations with**  
5 **Mental Wellbeing and Quality of Life in a Population-based Study**  
6  
7

8  
9 Running title: Stress & COPD  
10

11  
12 Yanxia Lu<sup>1, 2</sup>, Ma Shwe Zin Nyunt<sup>1, 2</sup>, Gwee Xinyi<sup>1, 2</sup>, Liang Feng<sup>1, 2</sup>, Lei Feng<sup>1, 2</sup>, Ee Heok  
13 Kua<sup>1, 2</sup>, Rajeev Kumar<sup>3</sup>, Tze Pin Ng<sup>1, 2</sup>.  
14

15  
16  
17 <sup>1</sup>Gerontological Research Programme, Yong Loo Lin School of Medicine, National  
18 University of Singapore  
19

20 <sup>2</sup>Department of Psychological Medicine, National University Hospital System, Singapore  
21

22 <sup>3</sup>Academic unit of psychological medicine, Australian National University Medical  
23 School, Canberra, Australia  
24  
25

26  
27 Author responsible for correspondence and request for reprints:  
28

29 A/P Tze-Pin Ng

30 Gerontological Research Programme, National University of Singapore,  
31

32 Department of Psychological Medicine,  
33

34 NUHS Tower Block, 9<sup>th</sup> Floor, 1E Kent Ridge Road, Singapore 119228  
35

36 Fax: 65-67772191, Tel: 65-67723478 Email: [pcmngtp@nus.edu.sg](mailto:pcmngtp@nus.edu.sg)  
37

38  
39 The study was supported by a research grant (No. 03/1/21/17/214) from the  
40 Biomedical Research Council, Agency for Science, Technology and Research (ASTAR).  
41  
42

43 Word count

44 Text: 2748 words

45 Abstract: 199 words

46 Tables: 2

47 Figure: 1  
48  
49  
50  
51  
52

53 **Key Words:** Life event stress; COPD; Cognitive function; Physical and psychological well-  
54 being; Quality of life  
55  
56  
57  
58  
59  
60



## ARTICAL SUMMARY

### Article focus

- The impact of life event stress on the mental wellbeing and quality of life of individuals with chronic obstructive pulmonary disease (COPD).

### Key messages

- Our findings showed that in individuals with COPD, life event stress had a greater detrimental effect on mental health and quality of life in comparison to non-COPD individuals.

### Strengths and limitations of this study

- The case definition for COPD in this study was accurately based on symptom and post-bronchial dilatation spirometric measures of chronic airflow obstruction that are diagnostic of COPD according to GOLD recommended criteria.
- The results from this general population-based study are largely free of clinical selection bias, and also controlled for important confounding by demographic and psychosocial variables in the analysis.
- Definite causal inferences cannot be made from the cross-sectional findings in this study. Further longitudinal studies are required.

**Abstract**

**Objectives:** To investigate whether life event stress was associated with greater psychological distress and poorer quality of life in older individuals with COPD, in comparison to their counterparts without COPD

**Design:** Cross-sectional study.

**Participants:** A population-based sample (N=497) of individuals aged 65 and above with COPD (post-bronchodilatation FEV<sub>1</sub>/FVC<0.70, N=136) and without COPD (N=277).

**Measurements:** We measured life event stress, depressive symptoms (GDS), cognitive symptoms and function (CFQ, MMSE), and physical and mental health functional status (SF36-PCS and SF36-MCS) in participants with and without COPD.

**Results:** In two-way analysis of variance controlling for potential confounders, life event stress was associated with significant main effects of worse GDS ( $p<0.001$ ), SF36-PCS ( $p=0.008$ ) and SF36-MCS scores ( $p<0.001$ ), and with significant interaction effects on GDS score ( $p<0.001$ ), SF36-PCS ( $p=0.045$ ) and SF36-MCS ( $p=0.034$ ) in participants with COPD more than in non-COPD participants. Main effect of COPD was found for post-bronchodilator FEV<sub>1</sub> ( $p<0.001$ ) and cognitive symptoms ( $p=0.02$ ).

**Conclusions:** Our findings indicate that life event stress was associated with more depressive symptoms and worse quality of life in individuals with COPD, much more than in those without COPD. Further studies should explore the role of cognitive appraisal of stress, coping resources and psycho-social support in this relationship.

## INTRODUCTION

Chronic obstructive pulmonary disease (COPD) stands out among chronic diseases with its high and rising prevalence and mortality [1], poor quality of life, frequent hospitalization and huge societal burden of care [2]. Because patients with COPD bear a heavy burden of psychological disturbance, psychiatric morbidity, and disability in daily living activities [3, 4], the mental health of COPD patients has received growing attention in recent years.

Life event stress is increasingly recognized to play important roles in the development and outcomes of chronic illness such as type II diabetes, coronary heart disease, gastroenterological disorders and obstetric outcomes [5]. Stress is well known to result in depression, psychological burnout, post-traumatic stress disorder (PTSD) in all ages, as well as cognitive impairment in late life [6]. Among COPD patients, an intrinsic source of stress is directly related to their illness, involving the experience of anxiety and distress provoked by breathing difficulties [7, 8], including muddled thoughts, heightened emotions, extreme fear and panic and decreased physical energy, and various difficulties in emotional functioning, sleep and rest, physical mobility, social interaction, activities of daily living, recreation, work and finance. However, the impact of life event stress in general including those extrinsic to illness-related experience on the physical and mental functioning and quality of life of individuals with COPD in comparison to non-COPD individuals has rarely been investigated [9, 10, 6]. The aim of this study was to investigate whether life event stress was associated with greater psychological distress and poorer quality of life in older individuals with COPD, in comparison to their counterparts without COPD.

The present study analyzed data collected on COPD status, life event stress, and measures of pulmonary function, cognitive function, depressive symptoms and quality of life in a population-based sample (Singapore Longitudinal Aging Study) [11] to

1  
2  
3 investigate the effect of life event stress on psychological functioning and quality of life.  
4  
5 We hypothesized that life event stress in the whole sample would be associated with  
6  
7 depressive symptoms and poor quality of life (main effect), but would have a stronger  
8  
9 association among individuals with COPD than among non-COPD individuals  
10  
11 (interaction), suggesting a greater detrimental effect on depressive symptoms and  
12  
13 quality of life. A secondary relationship analyzed in two-way analysis of variance (ANOVA)  
14  
15 was the main effect of COPD status (and its interaction with life event stress) on  
16  
17 primary outcomes of pulmonary and cognitive function, based on the known effects of  
18  
19 impaired pulmonary and cognitive function in COPD.  
20  
21  
22  
23

## 24 25 **METHODS**

### 26 27 **Study Design and Participants**

28  
29 The participants in the study were a subsample recruited from one locality (Bukit  
30  
31 Merah) in the South Central region of Singapore Longitudinal Aging Study (SLAS-2), a  
32  
33 prospective population-based cohort study of aging and health of community-dwelling  
34  
35 elderly [12]. We interviewed one participant from each household who were  
36  
37 Singaporean citizens or permanent residents aged 65 or older who were able to give  
38  
39 informed consent. Those who were too frail or ill and unable to complete the interview,  
40  
41 for reasons such as from post-stroke aphasia, cachexia or profound dementia, were  
42  
43 excluded. The participants who completed interviews and provided technically  
44  
45 acceptable spirometric data (N=497) represented a response rate of 78.5% of the  
46  
47 eligible participants. All participants signed written informed consent for the study  
48  
49 which was approved by the National University of Singapore Institutional Review Board.  
50  
51  
52

### 53 54 **COPD**

55  
56 We identified cases of COPD among the participants who had characteristic  
57  
58 symptoms of COPD and spirometric evidence of chronic airflow obstruction (post-  
59  
60

1  
2  
3 bronchial dilatation  $FEV_1/FVC < 0.70$ ), in accordance with the definition recommended  
4  
5 by the Global Initiative for Chronic Obstructive Lung Disease (GOLD) [13].  
6

7 Questions from the British Medical Research Council Questionnaire on chronic  
8  
9 respiratory symptoms were used to elicit symptoms characteristic of COPD: chronic  
10  
11 cough and/or sputum lasting at least 3 months in the year and/or breathlessness on  
12  
13 exertion.  
14

15  
16 Ventilatory function testing was performed using a portable, battery operated,  
17  
18 ultrasound transit-time based spirometer (Easy-One; Model 2001 Diagnostic Spirometer,  
19  
20 NDD Medical Technologies, Zurich, Switzerland). Calibration was checked daily with a 3-  
21  
22 L syringe. Forced expiratory maneuvers were performed with the respondent seated  
23  
24 with recommended guidelines and standardization of procedures: at least three  
25  
26 acceptable maneuvers, with forced vital capacity (FVC) and forced expiratory volume in  
27  
28 the first second ( $FEV_1$ ) reproducible within 200 ml. Chronic airflow obstruction as  
29  
30 defined as post-bronchial dilatation  $FEV_1/FVC < 0.70$ .  
31  
32

### 33 **Life Event Stress**

34  
35 Life event stress was measured by an 11-item life events inventory [14, 15] that  
36  
37 excluded personal illness experiences directly related to COPD. The participants were  
38  
39 asked to indicate yes or no as to whether any of eleven life events had occurred over  
40  
41 the past year ("spouse or partner die, a close friend or family member die or have a  
42  
43 serious illness (other than your spouse or partner), major problems with money, a  
44  
45 divorce or breakup, family member or close friend have a divorce or breakup, major  
46  
47 conflict with children or grandchildren, major accidents, disasters, muggings, unwanted  
48  
49 sexual experiences, robberies, or similar events, a family member or close friend lose  
50  
51 their job or retire, physically abused, verbally abused, or pet die"). If the participant  
52  
53 indicated (a) life event(s) had occurred, he/she was asked to appraise the event and  
54  
55 indicate on a scale of 1 (did not upset me) to 3 (upset me greatly) the extent it upset  
56  
57  
58  
59  
60

1  
2  
3 them. Frequency of life event stress was calculated. The scale also provides a life event  
4 stress score appraised by the participant that ranged from 0 to 33 with a higher score  
5 indicating a participant experienced a greater number of more stressful events.  
6  
7  
8

### 9 10 **Depressive Symptoms**

11  
12 The presence of depressive symptoms was determined by a depression screening  
13 scale for elderly populations, the 15-item Geriatric Depression Scale (GDS-15) with  
14 scores ranging from 0 to 15 [16]. The GDS was well suited for the study because it is  
15 largely free of the measurement artefact due to overlapping somatic symptoms of  
16 physical illness(es) and depression. In validation studies in the local older population  
17 [17], translated versions of the GDS-15 have been found to be a valid and reliable  
18 screening tool for depression: Cronbach's alpha of 0.80, and intraclass coefficients of  
19 test-retest reliability of 0.83 and inter-rater reliability of 0.94. Using a GDS cutoff of  $\geq 5$ ,  
20 the GDS-15 has a sensitivity of 0.97 and specificity of 0.95 (area under curve of 0.98)  
21 for determining major depressive disorder according to DSM-IV criteria. Depressive  
22 symptoms defined as such by  $GDS \geq 5$  is clinically significant, and such cases including  
23 "sub-threshold" depression, had been shown in the same population to be associated  
24 with significantly poorer mental and physical health and functional status, and more  
25 healthcare resource utilization compared to non-cases and were similar to or worse  
26 than syndrome threshold cases of depression [18].  
27  
28  
29  
30  
31  
32  
33  
34  
35  
36  
37  
38  
39  
40  
41  
42  
43

### 44 **Cognitive Function**

45  
46 Cognitive function was measured using the Cognitive Failures Questionnaire (CFQ)  
47 [19] and the Mini-Mental State Examination (MMSE) which were validated and widely  
48 used instruments to assess global cognitive functioning [20]. The CFQ uses a 5-point  
49 Likert-type scale (1 = Never, 5 = Very often) to evaluate self-reported cognitive problems  
50 (e.g., "Do you need to re-read instructions several times?"). Higher CFQ scores indicate  
51 more frequent cognitive problems and higher MMSE scores (0 to 30) indicate better  
52  
53  
54  
55  
56  
57  
58  
59  
60

1  
2  
3 global cognitive functioning, and MMSE scores of 23 or less are considered to be  
4  
5 cognitively impaired.  
6

### 7 **Physical and Mental Functioning**

8  
9 Physical and mental functional well-being was measured by the Medical Outcomes  
10 Study 36-item Short Form (SF-36) [21] which has been previously validated for use in  
11 Singaporeans [22]. Weighted summary measures of Physical Health Component  
12 Summary (PCS) score and Mental Health Component Summary (MCS) score were  
13  
14 computed with higher scores indicating better physical and mental health functioning  
15  
16 and quality of life.  
17  
18  
19  
20  
21

### 22 **Statistical Analyses**

23  
24 Data analysis was performed using the software package PASW Statistics (SPSS)  
25 version 18. In preliminary univariate analysis, participants with and without COPD were  
26 compared with respect to differences in number of life events, and perceived stress  
27 score, level of FEV1, CFQ, MMSE, GDS depression, SF-36 PCS and SF-36 MCS scores, as  
28 well as potential confounding variables, sex, age, ethnicity, smoking status, number of  
29 chronic diseases, using t-tests or chi-squared tests of significance. The independent  
30 main effects of life event stress and COPD (independent variables) as well as the  
31 interaction effects of life event stress and COPD on measures of pulmonary function,  
32 depressive symptoms, cognitive function, and quality of life (dependent variables) were  
33 analyzed using two-way analysis of variance (ANOVA) using generalized linear model  
34 [23] which adjusted for sex, age, ethnicity, smoking status, and number of chronic  
35 illness. The independent variable of primary interest was life event stress, and the  
36 primary outcome variables of interest were depressive symptoms and quality of life. A  
37 secondary relationship analyzed in the two-way ANOVA model was the main effect of  
38 COPD status (and its interaction with life event stress) on primary outcomes of  
39 pulmonary and cognitive function. For the outcome variables with significant interaction  
40  
41  
42  
43  
44  
45  
46  
47  
48  
49  
50  
51  
52  
53  
54  
55  
56  
57  
58  
59  
60

of life event stress and COPD, the simple effects of their relationships with life event stress score were investigated respectively in participants with and without COPD. Statistical significance was set at  $p < 0.05$ .

## RESULTS

This study consisted of 497 participants with the average age of 72.1. Among the respondents, 32.9% had COPD, and 67.1% had no COPD. The proportion of respondents with stressful life events in the past one year was 43.4%. The socio-demographic and psychological characteristics of study participants with and without COPD are shown in Table 1. Participants with COPD were found to have higher mean age ( $t=3.328$ ,  $p=0.001$ ), higher proportion of smokers ( $\chi^2 = 20.586$ ,  $df=3$ ,  $p < 0.001$ ) and increased number of diseases ( $t=7.096$ ,  $p < 0.001$ ). No significant difference in the number of life events or perceived stress was observed between COPD and non-COPD participants ( $p > 0.05$ ).

Table 1 shows that compared with those without COPD, participants with COPD had decreased post-bronchodilator FEV1 ( $t=6.185$ ,  $p < 0.001$ ), MMSE score ( $t=3.090$ ,  $p=0.002$ ) and SF-36 PCS ( $t=2.726$ ,  $p=0.007$ ) score. There were no difference in CFQ and GDS depression scores between participants with and without COPD ( $p > 0.05$ ) in the whole sample. Next, we evaluated the effect of life event stress on GDS, CFQ, MMSE, SF-36 PCS and SF-36 MCS scores by subgroups of participants with COPD and without COPD. As shown in Table 2, two-way analysis of variance in general linear model showed significant main effects of life event stress for GDS ( $F=64.500$ ,  $df=1$ ,  $p < 0.001$ ), SF36-PCS ( $F=7.054$ ,  $df=1$ ,  $p=0.008$ ) and SF36-MCS ( $F=14.710$ ,  $df=1$ ,  $p < 0.001$ ) scores, and significant interactions of life event stress with COPD were found as well for GDS ( $F=10.970$ ,  $df=1$ ,  $p=0.001$ ), SF36-PCS ( $F=4.055$ ,  $df=1$ ,  $p=0.045$ ), and SF36-MCS ( $F=4.538$ ,  $df=1$ ,  $p=0.034$ ) scores. The simple effects of life event stress on GDS, SF36-



PCS and SF36-MCS are shown for participants with and without COPD respectively in Figure 1. Increasing stress score was associated with higher GDS score, lower SF12-PCS and lower SF12-MCS scores in participants with COPD, more than in those without COPD after adjusting for potential confounders, indicating the association of life event stress with worse psychological distress and poorer quality of life among individuals with COPD, in comparison to non-COPD individuals. The other significant main effect found in two-way analysis of variance was of COPD for decreased post-bronchodilator FEV<sub>1</sub> (F=17.458, df=1, p<0.001) and higher CFQ scores (F=5.424, df=1, p=0.020) after adjustment of sex, age, ethnicity, smoking status, and number of chronic illness, indicating impaired pulmonary and cognitive functions in participants with COPD.

**Table 1. Socio-demographic, pulmonary and psychological variables of study participants aged 65 or older (Singapore Longitudinal Aging Study, SLAS)**

|                                           | COPD  |            | Non-COPD |            | Significant Test      | p      |
|-------------------------------------------|-------|------------|----------|------------|-----------------------|--------|
|                                           | N     | %          | N        | %          |                       |        |
| Total                                     | 136   | 32.9       | 277      | 67.1       |                       |        |
| Sex                                       |       |            |          |            |                       |        |
| Male                                      | 58    | 42.6       | 112      | 40.7       | $\chi^2=0.138$ , df=1 | 0.710  |
| Female                                    | 78    | 57.4       | 163      | 59.3       |                       |        |
| Age (years, M $\pm$ SD)                   | 73.19 | $\pm 5.87$ | 71.23    | $\pm 5.47$ | t=3.328               | 0.001  |
| Ethnicity                                 |       |            |          |            |                       |        |
| Chinese                                   | 121   | 89.0       | 241      | 87.6       | $\chi^2=0.154$ , df=1 | 0.694  |
| Non-Chinese                               | 15    | 11.0       | 34       | 12.4       |                       |        |
| Smoking                                   |       |            |          |            |                       |        |
| Never smoker                              | 77    | 57.6       | 211      | 77.3       | $\chi^2=20.59$ , df=3 | <0.001 |
| Past smoker                               | 29    | 21.6       | 41       | 15.0       |                       |        |
| Current smoker < 10 cigarettes daily      | 18    | 13.4       | 12       | 4.4        |                       |        |
| Current smoker $\geq$ 10 cigarettes daily | 10    | 7.5        | 9        | 3.3        |                       |        |
| Number of chronic diseases                | 2.60  | $\pm 1.30$ | 1.65     | 1.25       | t=7.096               | <0.001 |
| Number of Negative Life Events            | 0.67  | $\pm 0.98$ | 0.74     | $\pm 1.11$ | t=0.609               | 0.543  |
| Life Event Stress Score                   | 1.02  | $\pm 1.71$ | 1.12     | $\pm 1.78$ | t=0.525               | 0.600  |
| Post-bronchodilator FEV <sub>1</sub>      | 1.42  | $\pm 0.50$ | 1.75     | $\pm 0.52$ | t=6.185               | <0.001 |
| CFQ Score                                 | 38.0  | $\pm 9.21$ | 38.8     | $\pm 9.83$ | t=0.733               | 0.464  |
| MMSE Score                                | 26.4  | $\pm 3.26$ | 27.4     | $\pm 3.11$ | t=3.090               | 0.002  |
| GDS Depression score                      | 1.13  | $\pm 2.04$ | 0.84     | $\pm 1.69$ | t=1.487               | 0.138  |
| GDS $\geq 5$ , % (n)                      | 5.2   | (7)        | 2.9      | (8)        | $\chi^2=1.349$ , df=1 | 0.245  |
| SF-36 PCS                                 | 44.6  | $\pm 9.04$ | 47.1     | $\pm 7.21$ | t=2.726               | 0.007  |
| SF-36 MCS                                 | 54.9  | $\pm 7.83$ | 55.1     | $\pm 6.68$ | t=0.353               | 0.724  |

Figures in table denote mean  $\pm$  SD or number and %.  
Smoker is defined as smoking  $\geq$  10 cigarettes daily

**Table 2. Two-way ANOVA: Life event stress, COPD and mental and physical variables**

|                          | Main Effects of COPD (df=1) |        | Main Effects of Stress (df=1) |        | Interaction (df=1) |       |
|--------------------------|-----------------------------|--------|-------------------------------|--------|--------------------|-------|
|                          | F                           | P      | F                             | P      | F                  | p     |
| Post-bronchodilator FEV1 | 17.458                      | <0.001 | 0.323                         | 0.570  | 2.057              | 0.152 |
| CFQ Score                | 5.424                       | 0.020  | 1.927                         | 0.166  | 2.514              | 0.114 |
| MMSE Score               | 1.799                       | 0.181  | 1.159                         | 0.282  | 0.380              | 0.538 |
| GDS Depression score     | 2.353                       | 0.126  | 64.500                        | <0.001 | 10.970             | 0.001 |
| SF-36 PCS                | 0.432                       | 0.512  | 7.054                         | 0.008  | 4.055              | 0.045 |
| SF-36 MCS                | 0.659                       | 0.417  | 14.710                        | <0.001 | 4.538              | 0.034 |

Adjusted variables: sex, age, ethnicity, smoking status, and number of chronic illness.  
FEV1=Forced Expiratory Volume in the first second; CFQ=Cognitive Failure Questionnaire; MMSE=Mini-Mental State Examination; GDS=the Geriatric Depression Scale; SF-36=36-Item Short-Form Healthy Survey; PCS=Physical Health Component Summary; MCS= Mental Health Component Summary.

## DISCUSSION

The principal finding in this study indicated that life event stress was associated with depressive symptoms and poor quality of life in both COPD and non-COPD participants (main effects), but showed a significantly stronger association among individuals with COPD than among non-COPD individuals (interaction), suggesting a disproportionately greater detrimental effect. To our knowledge, no other studies have reported demonstrating this relationship.

It should be noted that participants with COPD actually did not report greater frequency of occurrence or perceived stress score of non-illness related life events than non-COPD participants. Instead, individuals with COPD appeared to experience the same number of non-illness related life events and perceived them to be equally stressful as their non-COPD counterparts, yet showed disproportionately greater psychological distress and poorer quality of life. These results suggest that individuals

1  
2  
3 with COPD may be more vulnerable to the adverse impact of stressful events than non-  
4  
5 COPD individuals.  
6

7 A greater detrimental effect of life event stress on psychological wellbeing and  
8  
9 quality of life in COPD individuals may hypothetically be explained by the possibility that  
10  
11 COPD individuals perceive and appraise stressful life events differently to individuals  
12  
13 without COPD, or that COPD individuals have poorer coping skills or fewer social and  
14  
15 economic resources, or both. We did not have measures of cognitive appraisal, coping  
16  
17 resources and social support to explore these hypotheses directly, and this is a  
18  
19 limitation of our study.  
20  
21

22 There are few studies that have investigated the relationship between cognitive  
23  
24 appraisal of stressful events, coping strategies and psychological distress in COPD  
25  
26 patients. A study by Andrenas and co-investigators [24] have assessed how hospitalized  
27  
28 patients with acutely exacerbated COPD appraised and coped with a recent stressful  
29  
30 event and their level of psychological distress. They reported that half of the  
31  
32 respondents tended to perceive their stressful event as representing a threat, 26% as  
33  
34 harmful, 7.6% as a loss, 4.3% as a challenge, and 11% characterized the stressful event  
35  
36 in some other ways. However, the authors found that neither types of stressful event,  
37  
38 stress intensity, primary or secondary appraisal, or number of coping strategies used  
39  
40 were significantly related to psychological distress. Only problem-solving coping  
41  
42 strategies were inversely related to psychological distress. This suggests that poor  
43  
44 coping skills may be the principal psychological problem among COPD patients that  
45  
46 contribute to their psychological distress and poor quality of life. However, further  
47  
48 studies should be conducted.  
49  
50  
51  
52

53 Our secondary finding of the main effects of COPD on FEV<sub>1</sub> was expected and thus  
54  
55 not surprising. However, the association of COPD with more frequent cognitive  
56  
57 problems was interesting, although the results for MMSE score were not significant  
58  
59  
60

1  
2  
3 after adjustment in two-way ANOVA, possibly due to sample size limitation. These  
4  
5 results are consistent with clinical and population studies that indicate significant  
6  
7 cognitive effects of COPD on deficits in abstract reasoning [25], complex visual motor  
8  
9 process [26], and verbal learning [27], language [28], attention [29], information  
10  
11 processing speed [29-31] and verbal learning and memory [30, 31].  
12

13  
14 The present study has strengths and limitations. The case definition for COPD is  
15  
16 accurately based on symptom and post-bronchial dilatation spirometric measures of  
17  
18 chronic airflow obstruction that are diagnostic of COPD according to GOLD  
19  
20 recommended criteria. Results from this general population-based study are largely  
21  
22 free of clinical selection bias, and also controlled for important confounding by  
23  
24 demographic and psychosocial variables in the analysis. The measure of life event  
25  
26 stress is modified to exclude illness-related stress from chronic diseases in this older  
27  
28 population. However, a limitation of the life event inventory is inter-categorical variability  
29  
30 and recall bias in the appraisal of the stressful life event [32]. In a cross-sectional study,  
31  
32 interpreting the causal relationship between stress and the health-related functional  
33  
34 outcomes can be uncertain. Further longitudinal studies are required.  
35  
36

37  
38 Studies [33-35] have reported that mental health status, including anxiety and  
39  
40 depressive symptoms, are better predictors of COPD-related quality of life than  
41  
42 pulmonary function. The present study supports this observation and further indicates  
43  
44 that life event stress has a starkly detrimental effect on mental health and quality of life  
45  
46 in patients with COPD. More studies of the effects of stress management and coping  
47  
48 strategy in psychological interventions in COPD should be investigated in randomized  
49  
50 controlled clinical trials.  
51

52  
53 It is increasingly being recognized that the identification of mood and anxiety  
54  
55 disorders, and psychological and psychosocial interventions to improve mood and  
56  
57 reduce anxiety are important for improving patient centered outcomes in COPD patients.  
58  
59  
60

1  
2  
3 However, in published clinical guidelines such as NICE, where the initial step care  
4 management by practitioners in primary care and general hospital settings includes  
5 low-intensity psychosocial interventions for patients with persistent subthreshold  
6 depressive symptoms or mild to moderate depression, there appears to be little  
7 attention given to identifying stressful life event(s) and supporting COPD patients  
8 experiencing stressful life events to prevent the onset of mood and anxiety disorders. In  
9 particular, group-based peer support, individual guided self-help based on cognitive  
10 behavioural therapy (CBT) principles or computerised CBT to reduce patients'  
11 vulnerability to stress may usefully include objective cognitive appraisal of stress,  
12 problem-solving coping skills, and relaxation therapy to help support COPD patients  
13 experiencing stressful life events.  
14  
15  
16  
17  
18  
19  
20  
21  
22  
23  
24  
25  
26

27 In conclusion, the present study found that life event stress was associated with  
28 more depressive symptoms and worse quality of life in individuals with COPD, much  
29 more than in those without COPD. Further studies should explore the role of cognitive  
30 appraisal of stress, coping resources and psycho-social support in this relationship.  
31  
32  
33  
34  
35  
36  
37  
38  
39  
40  
41  
42  
43  
44  
45  
46  
47  
48  
49  
50  
51  
52  
53  
54  
55  
56  
57  
58  
59  
60

**ACKNOWLEDGEMENTS**

The authors thank the following voluntary welfare organizations for their support of the Singapore Longitudinal Ageing Studies: Geylang East Home for the Aged, Presbyterian Community Services, Thye Hua Kwan Moral Society (Moral Neighbourhood Links), Yuhua Neighbourhood Link, Henderson Senior Citizens' Home, NTUC Eldercare Co-op Ltd, Thong Kheng Seniors Activity Centre (Queenstown Centre) and Redhill Moral Seniors Activity Centre.

The study is supported by a research grant (No. 03/1/21/17/214) from the Biomedical Research Council, Agency for Science, Technology and Research (ASTAR).

**DECLARATION OF INTEREST**

The authors declare that there are no declarations of interest in relation to the current study. The authors are responsible for the writing and the content of this article.

**DATA SHARING STATEMENT**

There is no additional data available.

## References

- 1 **Jemal A**, Ward E, Hao Y, et al. Trends in the leading causes of death in the United States, 1970-2002. *JAMA : the journal of the American Medical Association*. 2005; **294**: 1255-9.
- 2 **Murray CJ**, Lopez AD. Global mortality, disability, and the contribution of risk factors: Global Burden of Disease Study. *Lancet*. 1997; **349**: 1436-42.
- 3 **Zhang MWB**, Ho RCM, Cheung MWL, et al. Prevalence of depressive symptoms in patients with chronic obstructive pulmonary disease: a systematic review, meta-analysis and meta-regression. *General hospital psychiatry*. 2011; **33**: 217-23.
- 4 **Eisner MD**, Blanc PD, Yelin EH, et al. Influence of anxiety on health outcomes in COPD. *Thorax*. 2010; **65**: 229-34.
- 5 **Repetti RL**, Taylor SE, Seeman TE. Risky families: family social environments and the mental and physical health of offspring. *Psychol Bull*. 2002; **128**: 330-66.
- 6 **Marin MF**, Lord C, Andrews J, et al. Chronic stress, cognitive functioning and mental health. *Neurobiol Learn Mem*. 2011; **96**: 583-95.
- 7 **DeVito AJ**. Dyspnea during hospitalizations for acute phase of illness as recalled by patients with chronic obstructive pulmonary disease. *Heart Lung*. 1990; **19**: 186-91.
- 8 **Gurney-Smith B**, Cooper MJ, Wallace LM. Anxiety and Panic in Chronic Obstructive Pulmonary Disease: The Role of Catastrophic Thoughts. *Cognitive Therapy and Research*. 2002; **26**: 143-55.
- 9 **Guelli N**, Verrusio W, Linguanti A, et al. Montelukast therapy and psychological distress in chronic obstructive pulmonary disease (COPD): a preliminary report. *Archives of gerontology and geriatrics*. 2011; **52**: e36-9.
- 10 **Colby JP**, Linsky AS, Straus MA. Social stress and state-to-state differences in smoking and smoking related mortality in the United States. *Soc Sci Med*. 1994; **38**: 373-81.
- 11 **Ng TP**, Broekman BFP, Niti M, et al. Determinants of Successful Aging Using a Multidimensional Definition Among Chinese Elderly in Singapore. *American Journal of Geriatric Psychiatry*. 2009; **17**: 407-16.
- 12 **Niti M**, Ng TP, Kua EH, et al. Depression and chronic medical illnesses in Asian older adults: the role of subjective health and functional status. *Int J Geriatr Psychiatry*. 2007; **22**: 1087-94.
- 13 **Global Initiative for Chronic Obstructive Lung Disease**. Global strategy for the diagnosis, management and prevention of chronic obstructive pulmonary disease. Executive summary. *NHLBI/WHO workshop report*. 2001.
- 14 **Andenaes R**, Moum T, Kalfoss MH, et al. Changes in health status, psychological distress, and quality of life in COPD patients after hospitalization. *Qual Life Res*. 2006; **15**: 249-57.
- 15 **Andenaes R**. Psychological characteristics of patients with chronic obstructive pulmonary disease: a review. *J Psychosom Res*. 2005; **59**: 427-8.
- 16 **Yesavage JA**, Brink TL, Rose TL, et al. Development and validation of a geriatric depression screening scale: a preliminary report. *Journal of psychiatric research*. 1982; **17**: 37-49.
- 17 **Nyunt MSZ**, Fones C, Niti M, et al. Criterion-based validity and reliability of the Geriatric Depression Screening Scale (GDS-15) in a large validation sample of community-living Asian older adults. *Aging Ment Health*. 2009; **13**: 376-82.
- 18 **Soh KC**, Kumar R, Niti M, et al. Subsyndromal depression in old age: clinical significance and impact. *Int Psychogeriatr*. 2008; **20**: 188-200.
- 19 **Broadbent DE**, Cooper PF, FitzGerald P, et al. The Cognitive Failures Questionnaire (CFQ) and its correlates. *Br J Clin Psychol*. 1982; **21 (Pt 1)**: 1-16.
- 20 **Folstein MF**, Folstein SE, McHugh PR. "Mini-mental state". A practical method for grading the cognitive state of patients for the clinician. *Journal of psychiatric research*. 1975; **12**: 189-98.
- 21 **Ware JE**, Sherbourne CD. The MOS 36-item short-form health survey (SF-36). I. Conceptual framework and item selection. *Med Care*. 1992; **30**: 473-83.



- 1  
2  
3 22 **Thumboo J, Fong KY, Machin D, et al.** A community-based study of scaling assumptions  
4 and construct validity of the English (UK) and Chinese (HK) SF-36 in Singapore. *Qual Life Res.*  
5 2001; **10**: 175-88.
- 6 23 **Weinberg SL, Abramowitz SK.** Data Analysis for the Behavioral Sciences Using SPSS. New  
7 York: Cambridge University Press, 2002; 392-7.
- 8 24 **Andenaes R, Kalfoss MH, Wahl AK.** Coping and psychological distress in hospitalized  
9 patients with chronic obstructive pulmonary disease. *Heart Lung.* 2006; **35**: 46-57.
- 10 25 **Grant I, Heaton RK, McSweeney AJ, et al.** Neuropsychologic findings in hypoxemic chronic  
11 obstructive pulmonary disease. *Archives of internal medicine.* 1982; **142**: 1470-6.
- 12 26 **Fix AJ, Golden CJ, Daughton D, et al.** Neuropsychological deficits among patients with  
13 chronic obstructive pulmonary disease. *The International journal of neuroscience.* 1982; **16**: 99-  
14 105.
- 15 27 **Klein M, Gauggel S, Sachs G, et al.** Impact of chronic obstructive pulmonary disease  
16 (COPD) on attention functions. *Respiratory medicine.* 2010; **104**: 52-60.
- 17 28 **Cerhan JR, Folsom AR, Mortimer JA, et al.** Correlates of cognitive function in middle-  
18 aged adults. Atherosclerosis Risk in Communities (ARIC) Study Investigators. *Gerontology.* 1998;  
19 **44**: 95-105.
- 20 29 **Anstey KJ, Windsor TD, Jorm AF, et al.** Association of pulmonary function with cognitive  
21 performance in early, middle and late adulthood. *Gerontology.* 2004; **50**: 230-4.
- 22 30 **Sachdev PS, Anstey KJ, Parslow RA, et al.** Pulmonary function, cognitive impairment  
23 and brain atrophy in a middle-aged community sample. *Dementia and geriatric cognitive*  
24 *disorders.* 2006; **21**: 300-8.
- 25 31 **Min JY, Min KB, Paek D, et al.** The association between neurobehavioral performance  
26 and lung function. *Neurotoxicology.* 2007; **28**: 441-4.
- 27 32 **Dohrenwend BP.** Inventorying stressful life events as risk factors for psychopathology:  
28 Toward resolution of the problem of intracategory variability. *Psychological bulletin.* 2006; **132**:  
29 477-95.
- 30 33 **McSweeney AJ, Grant I, Heaton RK, et al.** Life quality of patients with chronic obstructive  
31 pulmonary disease. *Arch Intern Med.* 1982; **142**: 473-8.
- 32 34 **Kim HF, Kunik ME, Molinari VA, et al.** Functional impairment in COPD patients: the  
33 impact of anxiety and depression. *Psychosomatics.* 2000; **41**: 465-71.
- 34 35 **Cully JA, Graham DP, Stanley MA, et al.** Quality of life in patients with chronic obstructive  
35 pulmonary disease and comorbid anxiety or depression. *Psychosomatics.* 2006; **47**: 312-9.
- 36  
37  
38  
39  
40  
41  
42  
43  
44  
45  
46  
47  
48  
49  
50  
51  
52  
53  
54  
55  
56  
57  
58  
59  
60



1  
2  
3  
4  
5  
6  
7  
8  
9  
10  
11  
12  
13  
14  
15  
16  
17  
18  
19  
20  
21  
22  
23  
24  
25  
26  
27  
28  
29  
30  
31  
32  
33  
34  
35  
36  
37  
38  
39  
40  
41  
42  
43

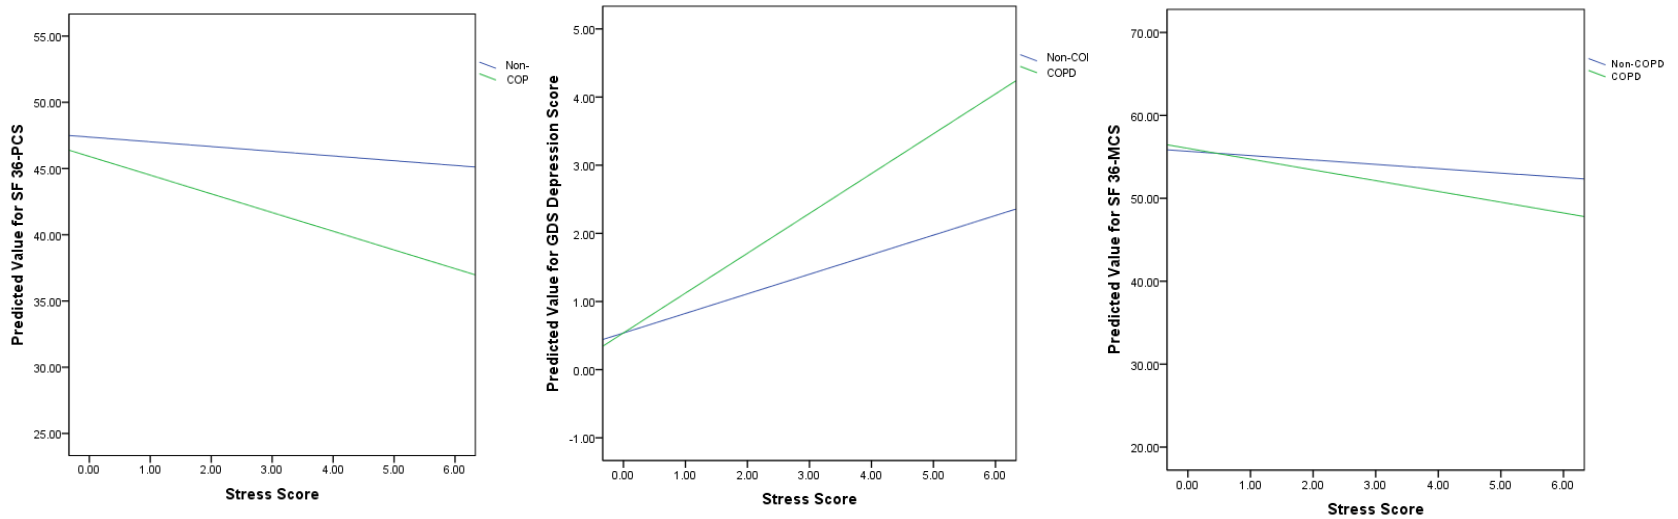

**Figure 1. Predicted value for SF-36 PCS, GDS depression score and SF 36-MCS in participants with and without COPD**

SF-36=36-Item Short-Form Healthy Survey; PCS=Physical Health Component Summary; GDS=the Geriatric Depression Scale; MCS= Mental Health Component Summary.

STROBE 2007 (v4) Statement—Checklist of items that should be included in reports of *cross-sectional studies*

| Section/Topic                | Item # | Recommendation                                                                                                                                                                       | Reported on page # |
|------------------------------|--------|--------------------------------------------------------------------------------------------------------------------------------------------------------------------------------------|--------------------|
| Title and abstract           | 1      | (a) Indicate the study's design with a commonly used term in the title or the abstract                                                                                               | 3                  |
|                              |        | (b) Provide in the abstract an informative and balanced summary of what was done and what was found                                                                                  | 3                  |
| <b>Introduction</b>          |        |                                                                                                                                                                                      |                    |
| Background/rationale         | 2      | Explain the scientific background and rationale for the investigation being reported                                                                                                 | 4                  |
| Objectives                   | 3      | State specific objectives, including any prespecified hypotheses                                                                                                                     | 5                  |
| <b>Methods</b>               |        |                                                                                                                                                                                      |                    |
| Study design                 | 4      | Present key elements of study design early in the paper                                                                                                                              | 6                  |
| Setting                      | 5      | Describe the setting, locations, and relevant dates, including periods of recruitment, exposure, follow-up, and data collection                                                      | 6                  |
| Participants                 | 6      | (a) Give the eligibility criteria, and the sources and methods of selection of participants                                                                                          | 6                  |
| Variables                    | 7      | Clearly define all outcomes, exposures, predictors, potential confounders, and effect modifiers. Give diagnostic criteria, if applicable                                             | 6-8                |
| Data sources/<br>measurement | 8*     | For each variable of interest, give sources of data and details of methods of assessment (measurement). Describe comparability of assessment methods if there is more than one group | 6-8                |
| Bias                         | 9      | Describe any efforts to address potential sources of bias                                                                                                                            | 6-9                |
| Study size                   | 10     | Explain how the study size was arrived at                                                                                                                                            | 6                  |
| Quantitative variables       | 11     | Explain how quantitative variables were handled in the analyses. If applicable, describe which groupings were chosen and why                                                         | 6-9                |
| Statistical methods          | 12     | (a) Describe all statistical methods, including those used to control for confounding                                                                                                | 8-9                |
|                              |        | (b) Describe any methods used to examine subgroups and interactions                                                                                                                  | 8-9                |
|                              |        | (c) Explain how missing data were addressed                                                                                                                                          | NA                 |
|                              |        | (d) If applicable, describe analytical methods taking account of sampling strategy                                                                                                   | NA                 |
|                              |        | (e) Describe any sensitivity analyses                                                                                                                                                | NA                 |
| <b>Results</b>               |        |                                                                                                                                                                                      |                    |

|                          |     |                                                                                                                                                                                                              |       |
|--------------------------|-----|--------------------------------------------------------------------------------------------------------------------------------------------------------------------------------------------------------------|-------|
| Participants             | 13* | (a) Report numbers of individuals at each stage of study—eg numbers potentially eligible, examined for eligibility, confirmed eligible, included in the study, completing follow-up, and analysed            | 9     |
|                          |     | (b) Give reasons for non-participation at each stage                                                                                                                                                         | 6     |
|                          |     | (c) Consider use of a flow diagram                                                                                                                                                                           | NA    |
| Descriptive data         | 14* | (a) Give characteristics of study participants (eg demographic, clinical, social) and information on exposures and potential confounders                                                                     | 9     |
|                          |     | (b) Indicate number of participants with missing data for each variable of interest                                                                                                                          | NA    |
| Outcome data             | 15* | Report numbers of outcome events or summary measures                                                                                                                                                         | 9     |
| Main results             | 16  | (a) Give unadjusted estimates and, if applicable, confounder-adjusted estimates and their precision (eg, 95% confidence interval). Make clear which confounders were adjusted for and why they were included | 9-11  |
|                          |     | (b) Report category boundaries when continuous variables were categorized                                                                                                                                    | 9-11  |
|                          |     | (c) If relevant, consider translating estimates of relative risk into absolute risk for a meaningful time period                                                                                             | NA    |
| Other analyses           | 17  | Report other analyses done—eg analyses of subgroups and interactions, and sensitivity analyses                                                                                                               | 9-11  |
| <b>Discussion</b>        |     |                                                                                                                                                                                                              |       |
| Key results              | 18  | Summarise key results with reference to study objectives                                                                                                                                                     | 11    |
| Limitations              | 19  | Discuss limitations of the study, taking into account sources of potential bias or imprecision. Discuss both direction and magnitude of any potential bias                                                   | 13    |
| Interpretation           | 20  | Give a cautious overall interpretation of results considering objectives, limitations, multiplicity of analyses, results from similar studies, and other relevant evidence                                   | 11-13 |
| Generalisability         | 21  | Discuss the generalisability (external validity) of the study results                                                                                                                                        | 11-13 |
| <b>Other information</b> |     |                                                                                                                                                                                                              |       |
| Funding                  | 22  | Give the source of funding and the role of the funders for the present study and, if applicable, for the original study on which the present article is based                                                | 14    |

\*Give information separately for cases and controls in case-control studies and, if applicable, for exposed and unexposed groups in cohort and cross-sectional studies.

**Note:** An Explanation and Elaboration article discusses each checklist item and gives methodological background and published examples of transparent reporting. The STROBE checklist is best used in conjunction with this article (freely available on the Web sites of PLoS Medicine at <http://www.plosmedicine.org/>, Annals of Internal Medicine at <http://www.annals.org/>, and Epidemiology at <http://www.epidem.com/>). Information on the STROBE Initiative is available at [www.strobe-statement.org](http://www.strobe-statement.org).

1  
2  
3  
4 **Life Event Stress and Chronic Obstructive Pulmonary Disease (COPD): Associations with**  
5 **Mental Wellbeing and Quality of Life in a Population-based Study**  
6  
7

8  
9 Running title: Stress & COPD  
10

11  
12 Yanxia Lu<sup>1, 2</sup>, Ma Shwe Zin Nyunt<sup>1, 2</sup>, Gwee Xinyi<sup>1, 2</sup>, Liang Feng<sup>1, 2</sup>, Lei Feng<sup>1, 2</sup>, Ee Heok  
13 Kua<sup>1, 2</sup>, Rajeev Kumar<sup>3</sup>, Tze Pin Ng<sup>1, 2</sup>.  
14

15  
16  
17 <sup>1</sup>Gerontological Research Programme, Yong Loo Lin School of Medicine, National  
18 University of Singapore  
19

20 <sup>2</sup>Department of Psychological Medicine, National University Hospital System, Singapore  
21

22 <sup>3</sup>Academic unit of psychological medicine, Australian National University Medical  
23 School, Canberra, Australia  
24  
25  
26

27 Author responsible for correspondence and request for reprints:  
28

29 A/P Tze-Pin Ng  
30

31 Gerontological Research Programme, National University of Singapore,  
32

33 Department of Psychological Medicine,  
34

35 NUHS Tower Block, 9<sup>th</sup> Floor, 1E Kent Ridge Road, Singapore 119228  
36

37 Fax: 65-67772191, Tel: 65-67723478 Email: [pcmngtp@nus.edu.sg](mailto:pcmngtp@nus.edu.sg)  
38  
39

40 The study was supported by a research grant (No. 03/1/21/17/214) from the  
41 Biomedical Research Council, Agency for Science, Technology and Research (ASTAR).  
42

43 Word count  
44

45 Text: 2748 words  
46

47 Abstract: 199 words  
48

49 Tables: 2  
50

51 Figure: 1  
52

53 **Key Words:** Life event stress; COPD; Cognitive function; Physical and psychological well-  
54 being; Quality of life  
55  
56  
57  
58  
59  
60

## ARTICAL SUMMARY

### Article focus

- The impact of life event stress on the mental wellbeing and quality of life of individuals with chronic obstructive pulmonary disease (COPD).

### Key messages

- Our findings showed that in individuals with COPD, life event stress had a greater detrimental effect on mental health and quality of life in comparison to non-COPD individuals.

### Strengths and limitations of this study

- The case definition for COPD in this study was accurately based on symptom and post-bronchial dilatation spirometric measures of chronic airflow obstruction that are diagnostic of COPD according to GOLD recommended criteria.
- The results from this general population-based study are largely free of clinical selection bias, and also controlled for important confounding by demographic and psychosocial variables in the analysis.
- Definite causal inferences cannot be made from the cross-sectional findings in this study. Further longitudinal studies are required.

**Abstract**

**Objectives:** To investigate whether life event stress was associated with greater psychological distress and poorer quality of life in older individuals with COPD, in comparison to their counterparts without COPD

**Design:** Cross-sectional study.

**Participants:** A population-based sample (N=497) of individuals aged 65 and above with COPD (post-bronchodilatation FEV<sub>1</sub>/FVC<0.70, N=136) and without COPD (N=277).

**Measurements:** We measured life event stress, depressive symptoms (GDS), cognitive symptoms and function (CFQ, MMSE), and physical and mental health functional status (SF36-PCS and SF36-MCS) in participants with and without COPD.

**Results:** In two-way analysis of variance controlling for potential confounders, life event stress was associated with significant main effects of worse GDS ( $p<0.001$ ), SF36-PCS ( $p=0.008$ ) and SF36-MCS scores ( $p<0.001$ ), and with significant interaction effects on GDS score ( $p<0.001$ ), SF36-PCS ( $p=0.045$ ) and SF36-MCS ( $p=0.034$ ) in participants with COPD more than in non-COPD participants. Main effect of COPD was found for post-bronchodilator FEV<sub>1</sub> ( $p<0.001$ ) and cognitive symptoms ( $p=0.02$ ).

**Conclusions:** Our findings indicate that life event stress was associated with more depressive symptoms and worse quality of life in individuals with COPD, much more than in those without COPD. Further studies should explore the role of cognitive appraisal of stress, coping resources and psycho-social support in this relationship.

## INTRODUCTION

Chronic obstructive pulmonary disease (COPD) stands out among chronic diseases with its high and rising prevalence and mortality [1], poor quality of life, frequent hospitalization and huge societal burden of care [2]. Because patients with COPD bear a heavy burden of psychological disturbance, psychiatric morbidity, and disability in daily living activities [3, 4], the mental health of COPD patients has received growing attention in recent years.

Life event stress is increasingly recognized to play important roles in the development and outcomes of chronic illness such as type II diabetes, coronary heart disease, gastroenterological disorders and obstetric outcomes [5]. Stress is well known to result in depression, psychological burnout, post-traumatic stress disorder (PTSD) in all ages, as well as cognitive impairment in late life [6]. Among COPD patients, an intrinsic source of stress is directly related to their illness, involving the experience of anxiety and distress provoked by breathing difficulties [7, 8], including muddled thoughts, heightened emotions, extreme fear and panic and decreased physical energy, and various difficulties in emotional functioning, sleep and rest, physical mobility, social interaction, activities of daily living, recreation, work and finance. However, the impact of life event stress in general including those extrinsic to illness-related experience on the physical and mental functioning and quality of life of individuals with COPD in comparison to non-COPD individuals has rarely been investigated [9, 10, 6]. The aim of this study was to investigate whether life event stress was associated with greater psychological distress and poorer quality of life in older individuals with COPD, in comparison to their counterparts without COPD.

The present study analyzed data collected on COPD status, life event stress, and measures of pulmonary function, cognitive function, depressive symptoms and quality of in a population-based sample (Singapore Longitudinal Aging Study) [11] to

1  
2  
3 investigate the effect of life event stress on psychological functioning and quality of life.  
4  
5 We hypothesized that life event stress in the whole sample would be associated with  
6  
7 depressive symptoms and poor quality of life (main effect), but would have a stronger  
8  
9 association among individuals with COPD than among non-COPD individuals  
10  
11 (interaction), suggesting a greater detrimental effect on depressive symptoms and  
12  
13 quality of life. A secondary relationship analyzed in two-way analysis of variance (ANOVA)  
14  
15 was the main effect of COPD status (and its interaction with life event stress) on  
16  
17 primary outcomes of pulmonary and cognitive function, based on the known effects of  
18  
19 impaired pulmonary and cognitive function in COPD.  
20  
21  
22  
23

## 24 25 **METHODS**

### 26 27 **Study Design and Participants**

28  
29 The participants in the study were a subsample recruited from one locality (Bukit  
30  
31 Merah) in the South Central region of Singapore Longitudinal Aging Study (SLAS-2), a  
32  
33 prospective population-based cohort study of aging and health of community-dwelling  
34  
35 elderly [12]. We interviewed one participant from each household who were  
36  
37 Singaporean citizens or permanent residents aged 65 or older who were able to give  
38  
39 informed consent. Those who were too frail or ill and unable to complete the interview,  
40  
41 for reasons such as from post-stroke aphasia, cachexia or profound dementia, were  
42  
43 excluded. The participants who completed interviews and provided technically  
44  
45 acceptable spirometric data (N=497) represented a response rate of 78.5% of the  
46  
47 eligible participants. All participants signed written informed consent for the study  
48  
49 which was approved by the National University of Singapore Institutional Review Board.  
50  
51  
52

### 53 54 **COPD**

55  
56 We identified cases of COPD among the participants who had characteristic  
57  
58 symptoms of COPD and spirometric evidence of chronic airflow obstruction (post-  
59  
60



1  
2  
3 bronchial dilatation  $FEV_1/FVC < 0.70$ ), in accordance with the definition recommended  
4  
5 by the Global Initiative for Chronic Obstructive Lung Disease (GOLD) [13].  
6

7 Questions from the British Medical Research Council Questionnaire on chronic  
8  
9 respiratory symptoms were used to elicit symptoms characteristic of COPD: chronic  
10  
11 cough and/or sputum lasting at least 3 months in the year and/or breathlessness on  
12  
13 exertion.  
14

15  
16 Ventilatory function testing was performed using a portable, battery operated,  
17  
18 ultrasound transit-time based spirometer (Easy-One; Model 2001 Diagnostic Spirometer,  
19  
20 NDD Medical Technologies, Zurich, Switzerland). Calibration was checked daily with a 3-  
21  
22 L syringe. Forced expiratory maneuvers were performed with the respondent seated  
23  
24 with recommended guidelines and standardization of procedures: at least three  
25  
26 acceptable maneuvers, with forced vital capacity (FVC) and forced expiratory volume in  
27  
28 the first second ( $FEV_1$ ) reproducible within 200 ml. Chronic airflow obstruction as  
29  
30 defined as post-bronchial dilatation  $FEV_1/FVC < 0.70$ .  
31  
32

### 33 **Life Event Stress**

34  
35 Life event stress was measured by an 11-item life events inventory [14, 15] that  
36  
37 excluded personal illness experiences directly related to COPD. The participants were  
38  
39 asked to indicate yes or no as to whether any of eleven life events had occurred over  
40  
41 the past year ("spouse or partner die, a close friend or family member die or have a  
42  
43 serious illness (other than your spouse or partner), major problems with money, a  
44  
45 divorce or breakup, family member or close friend have a divorce or breakup, major  
46  
47 conflict with children or grandchildren, major accidents, disasters, muggings, unwanted  
48  
49 sexual experiences, robberies, or similar events, a family member or close friend lose  
50  
51 their job or retire, physically abused, verbally abused, or pet die"). If the participant  
52  
53 indicated (a) life event(s) had occurred, he/she was asked to appraise the event and  
54  
55 indicate on a scale of 1 (did not upset me) to 3 (upset me greatly) the extent it upset  
56  
57  
58  
59  
60

1  
2  
3 them. Frequency of life event stress was calculated. The scale also provides a life event  
4 stress score appraised by the participant that ranged from 0 to 33 with a higher score  
5 indicating a participant experienced a greater number of more stressful events.  
6  
7  
8

### 9 10 **Depressive Symptoms**

11  
12 The presence of depressive symptoms was determined by a depression screening  
13 scale for elderly populations, the 15-item Geriatric Depression Scale (GDS-15) with  
14 scores ranging from 0 to 15 [16]. The GDS was well suited for the study because it is  
15 largely free of the measurement artefact due to overlapping somatic symptoms of  
16 physical illness(es) and depression. In validation studies in the local older population  
17 [17], translated versions of the GDS-15 have been found to be a valid and reliable  
18 screening tool for depression: Cronbach's alpha of 0.80, and intraclass coefficients of  
19 test-retest reliability of 0.83 and inter-rater reliability of 0.94. Using a GDS cutoff of  $\geq 5$ ,  
20 the GDS-15 has a sensitivity of 0.97 and specificity of 0.95 (area under curve of 0.98)  
21 for determining major depressive disorder according to DSM-IV criteria. Depressive  
22 symptoms defined as such by  $GDS \geq 5$  is clinically significant, and such cases including  
23 "sub-threshold" depression, had been shown in the same population to be associated  
24 with significantly poorer mental and physical health and functional status, and more  
25 healthcare resource utilization compared to non-cases and were similar to or worse  
26 than syndrome threshold cases of depression [18].  
27  
28  
29  
30  
31  
32  
33  
34  
35  
36  
37  
38  
39  
40  
41  
42  
43

### 44 **Cognitive Function**

45  
46 Cognitive function was measured using the Cognitive Failures Questionnaire (CFQ)  
47 [19] and the Mini-Mental State Examination (MMSE) which were validated and widely  
48 used instruments to assess global cognitive functioning [20]. The CFQ uses a 5-point  
49 Likert-type scale (1 = Never, 5 = Very often) to evaluate self-reported cognitive problems  
50 (e.g., "Do you need to re-read instructions several times?"). Higher CFQ scores indicate  
51 more frequent cognitive problems and higher MMSE scores (0 to 30) indicate better  
52  
53  
54  
55  
56  
57  
58  
59  
60

1  
2  
3 global cognitive functioning, and MMSE scores of 23 or less are considered to be  
4  
5 cognitively impaired.  
6

### 7 **Physical and Mental Functioning**

8  
9 Physical and mental functional well-being was measured by the Medical Outcomes  
10 Study 36-item Short Form (SF-36) [21] which has been previously validated for use in  
11 Singaporeans [22]. Weighted summary measures of Physical Health Component  
12 Summary (PCS) score and Mental Health Component Summary (MCS) score were  
13  
14 computed with higher scores indicating better physical and mental health functioning  
15  
16 and quality of life.  
17  
18  
19  
20  
21

### 22 **Statistical Analyses**

23  
24 Data analysis was performed using the software package PASW Statistics (SPSS)  
25 version 18. In preliminary univariate analysis, participants with and without COPD were  
26 compared with respect to differences in number of life events, and perceived stress  
27 score, level of FEV1, CFQ, MMSE, GDS depression, SF-36 PCS and SF-36 MCS scores, as  
28 well as potential confounding variables, sex, age, ethnicity, smoking status, number of  
29 chronic diseases, using t-tests or chi-squared tests of significance. The independent  
30 main effects of life event stress and COPD (independent variables) as well as the  
31 interaction effects of life event stress and COPD on measures of pulmonary function,  
32 depressive symptoms, cognitive function, and quality of life (dependent variables) were  
33 analyzed using two-way analysis of variance (ANOVA) using generalized linear model  
34 [23] which adjusted for sex, age, ethnicity, smoking status, and number of chronic  
35 illness. The independent variable of primary interest was life event stress, and the  
36 primary outcome variables of interest were depressive symptoms and quality of life. A  
37 secondary relationship analyzed in the two-way ANOVA model was the main effect of  
38 COPD status (and its interaction with life event stress) on primary outcomes of  
39 pulmonary and cognitive function. For the outcome variables with significant interaction  
40  
41  
42  
43  
44  
45  
46  
47  
48  
49  
50  
51  
52  
53  
54  
55  
56  
57  
58  
59  
60

of life event stress and COPD, the simple effects of their relationships with life event stress score were investigated respectively in participants with and without COPD. Statistical significance was set at  $p < 0.05$ .

## RESULTS

This study consisted of 497 participants with the average age of 72.1. Among the respondents, 32.9% had COPD, and 67.1% had no COPD. The proportion of respondents with stressful life events in the past one year was 43.4%. The socio-demographic and psychological characteristics of study participants with and without COPD are shown in Table 1. Participants with COPD were found to have higher mean age ( $t=3.328$ ,  $p=0.001$ ), higher proportion of smokers ( $\chi^2 = 20.586$ ,  $df=3$ ,  $p < 0.001$ ) and increased number of diseases ( $t=7.096$ ,  $p < 0.001$ ). No significant difference in the number of life events or perceived stress was observed between COPD and non-COPD participants ( $p > 0.05$ ).

Table 1 shows that compared with those without COPD, participants with COPD had decreased post-bronchodilator FEV1 ( $t=6.185$ ,  $p < 0.001$ ), MMSE score ( $t=3.090$ ,  $p=0.002$ ) and SF-36 PCS ( $t=2.726$ ,  $p=0.007$ ) score. There were no difference in CFQ and GDS depression scores between participants with and without COPD ( $p > 0.05$ ) in the whole sample. Next, we evaluated the effect of life event stress on GDS, CFQ, MMSE, SF-36 PCS and SF-36 MCS scores by subgroups of participants with COPD and without COPD. As shown in Table 2, two-way analysis of variance in general linear model showed significant main effects of life event stress for GDS ( $F=64.500$ ,  $df=1$ ,  $p < 0.001$ ), SF36-PCS ( $F=7.054$ ,  $df=1$ ,  $p=0.008$ ) and SF36-MCS ( $F=14.710$ ,  $df=1$ ,  $p < 0.001$ ) scores, and significant interactions of life event stress with COPD were found as well for GDS ( $F=10.970$ ,  $df=1$ ,  $p=0.001$ ), SF36-PCS ( $F=4.055$ ,  $df=1$ ,  $p=0.045$ ), and SF36-MCS ( $F=4.538$ ,  $df=1$ ,  $p=0.034$ ) scores. The simple effects of life event stress on GDS, SF36-

PCS and SF36-MCS are shown for participants with and without COPD respectively in Figure 1. Increasing stress score was associated with higher GDS score, lower SF12-PCS and lower SF12-MCS scores in participants with COPD, more than in those without COPD after adjusting for potential confounders, indicating the association of life event stress with worse psychological distress and poorer quality of life among individuals with COPD, in comparison to non-COPD individuals. The other significant main effect found in two-way analysis of variance was of COPD for decreased post-bronchodilator FEV<sub>1</sub> (F=17.458, df=1, p<0.001) and higher CFQ scores (F=5.424, df=1, p=0.020) after adjustment of sex, age, ethnicity, smoking status, and number of chronic illness, indicating impaired pulmonary and cognitive functions in participants with COPD.

**Table 1. Socio-demographic, pulmonary and psychological variables of study participants aged 65 or older (Singapore Longitudinal Aging Study, SLAS)**

|                                           | COPD  |            | Non-COPD |            | Significant Test      | p      |
|-------------------------------------------|-------|------------|----------|------------|-----------------------|--------|
|                                           | N     | %          | N        | %          |                       |        |
| Total                                     | 136   | 32.9       | 277      | 67.1       |                       |        |
| Sex                                       |       |            |          |            |                       |        |
| Male                                      | 58    | 42.6       | 112      | 40.7       | $\chi^2=0.138$ , df=1 | 0.710  |
| Female                                    | 78    | 57.4       | 163      | 59.3       |                       |        |
| Age (years, M $\pm$ SD)                   | 73.19 | $\pm 5.87$ | 71.23    | $\pm 5.47$ | t=3.328               | 0.001  |
| Ethnicity                                 |       |            |          |            |                       |        |
| Chinese                                   | 121   | 89.0       | 241      | 87.6       | $\chi^2=0.154$ , df=1 | 0.694  |
| Non-Chinese                               | 15    | 11.0       | 34       | 12.4       |                       |        |
| Smoking                                   |       |            |          |            |                       |        |
| Never smoker                              | 77    | 57.6       | 211      | 77.3       | $\chi^2=20.59$ , df=3 | <0.001 |
| Past smoker                               | 29    | 21.6       | 41       | 15.0       |                       |        |
| Current smoker < 10 cigarettes daily      | 18    | 13.4       | 12       | 4.4        |                       |        |
| Current smoker $\geq$ 10 cigarettes daily | 10    | 7.5        | 9        | 3.3        |                       |        |
| Number of chronic diseases                | 2.60  | $\pm 1.30$ | 1.65     | 1.25       | t=7.096               | <0.001 |
| Number of Negative Life Events            | 0.67  | $\pm 0.98$ | 0.74     | $\pm 1.11$ | t=0.609               | 0.543  |
| Life Event Stress Score                   | 1.02  | $\pm 1.71$ | 1.12     | $\pm 1.78$ | t=0.525               | 0.600  |
| Post-bronchodilator FEV <sub>1</sub>      | 1.42  | $\pm 0.50$ | 1.75     | $\pm 0.52$ | t=6.185               | <0.001 |
| CFQ Score                                 | 38.0  | $\pm 9.21$ | 38.8     | $\pm 9.83$ | t=0.733               | 0.464  |
| MMSE Score                                | 26.4  | $\pm 3.26$ | 27.4     | $\pm 3.11$ | t=3.090               | 0.002  |
| GDS Depression score                      | 1.13  | $\pm 2.04$ | 0.84     | $\pm 1.69$ | t=1.487               | 0.138  |
| GDS $\geq 5$ , % (n)                      | 5.2   | (7)        | 2.9      | (8)        | $\chi^2=1.349$ , df=1 | 0.245  |
| SF-36 PCS                                 | 44.6  | $\pm 9.04$ | 47.1     | $\pm 7.21$ | t=2.726               | 0.007  |
| SF-36 MCS                                 | 54.9  | $\pm 7.83$ | 55.1     | $\pm 6.68$ | t=0.353               | 0.724  |

Figures in table denote mean  $\pm$  SD or number and %.  
Smoker is defined as smoking  $\geq$  10 cigarettes daily

**Table 2. Two-way ANOVA: Life event stress, COPD and mental and physical variables**

|                          | Main Effects of COPD (df=1) |        | Main Effects of Stress (df=1) |        | Interaction (df=1) |       |
|--------------------------|-----------------------------|--------|-------------------------------|--------|--------------------|-------|
|                          | F                           | P      | F                             | P      | F                  | p     |
| Post-bronchodilator FEV1 | 17.458                      | <0.001 | 0.323                         | 0.570  | 2.057              | 0.152 |
| CFQ Score                | 5.424                       | 0.020  | 1.927                         | 0.166  | 2.514              | 0.114 |
| MMSE Score               | 1.799                       | 0.181  | 1.159                         | 0.282  | 0.380              | 0.538 |
| GDS Depression score     | 2.353                       | 0.126  | 64.500                        | <0.001 | 10.970             | 0.001 |
| SF-36 PCS                | 0.432                       | 0.512  | 7.054                         | 0.008  | 4.055              | 0.045 |
| SF-36 MCS                | 0.659                       | 0.417  | 14.710                        | <0.001 | 4.538              | 0.034 |

Adjusted variables: sex, age, ethnicity, smoking status, and number of chronic illness.  
FEV1=Forced Expiratory Volume in the first second; CFQ=Cognitive Failure Questionnaire; MMSE=Mini-Mental State Examination; GDS=the Geriatric Depression Scale; SF-36=36-Item Short-Form Healthy Survey; PCS=Physical Health Component Summary; MCS= Mental Health Component Summary.

## DISCUSSION

The principal finding in this study indicated that life event stress was associated with depressive symptoms and poor quality of life in both COPD and non-COPD participants (main effects), but showed a significantly stronger association among individuals with COPD than among non-COPD individuals (interaction), suggesting a disproportionately greater detrimental effect. To our knowledge, no other studies have reported demonstrating this relationship.

It should be noted that participants with COPD actually did not report greater frequency of occurrence or perceived stress score of non-illness related life events than non-COPD participants. Instead, individuals with COPD appeared to experience the same number of non-illness related life events and perceived them to be equally stressful as their non-COPD counterparts, yet showed disproportionately greater psychological distress and poorer quality of life. These results suggest that individuals

1  
2  
3 with COPD may be more vulnerable to the adverse impact of stressful events than non-  
4  
5 COPD individuals.  
6

7 A greater detrimental effect of life event stress on psychological wellbeing and  
8  
9 quality of life in COPD individuals may hypothetically be explained by the possibility that  
10  
11 COPD individuals perceive and appraise stressful life events differently to individuals  
12  
13 without COPD, or that COPD individuals have poorer coping skills or fewer social and  
14  
15 economic resources, or both. We did not have measures of cognitive appraisal, coping  
16  
17 resources and social support to explore these hypotheses directly, and this is a  
18  
19 limitation of our study.  
20  
21

22 There are few studies that have investigated the relationship between cognitive  
23  
24 appraisal of stressful events, coping strategies and psychological distress in COPD  
25  
26 patients. A study by Andrenas and co-investigators [24] have assessed how hospitalized  
27  
28 patients with acutely exacerbated COPD appraised and coped with a recent stressful  
29  
30 event and their level of psychological distress. They reported that half of the  
31  
32 respondents tended to perceive their stressful event as representing a threat, 26% as  
33  
34 harmful, 7.6% as a loss, 4.3% as a challenge, and 11% characterized the stressful event  
35  
36 in some other ways. However, the authors found that neither types of stressful event,  
37  
38 stress intensity, primary or secondary appraisal, or number of coping strategies used  
39  
40 were significantly related to psychological distress. Only problem-solving coping  
41  
42 strategies were inversely related to psychological distress. This suggests that poor  
43  
44 coping skills may be the principal psychological problem among COPD patients that  
45  
46 contribute to their psychological distress and poor quality of life. However, further  
47  
48 studies should be conducted.  
49  
50  
51  
52

53 Our secondary finding of the main effects of COPD on FEV<sub>1</sub> was expected and thus  
54  
55 not surprising. However, the association of COPD with more frequent cognitive  
56  
57 problems was interesting, although the results for MMSE score were not significant  
58  
59  
60



1  
2  
3 after adjustment in two-way ANOVA, possibly due to sample size limitation. These  
4  
5 results are consistent with clinical and population studies that indicate significant  
6  
7 cognitive effects of COPD on deficits in abstract reasoning [25], complex visual motor  
8  
9 process [26], and verbal learning [27], language [28], attention [29], information  
10  
11 processing speed [29-31] and verbal learning and memory [30, 31].  
12

13  
14 The present study has strengths and limitations. The case definition for COPD is  
15  
16 accurately based on symptom and post-bronchial dilatation spirometric measures of  
17  
18 chronic airflow obstruction that are diagnostic of COPD according to GOLD  
19  
20 recommended criteria. Results from this general population-based study are largely  
21  
22 free of clinical selection bias, and also controlled for important confounding by  
23  
24 demographic and psychosocial variables in the analysis. The measure of life event  
25  
26 stress is modified to exclude illness-related stress from chronic diseases in this older  
27  
28 population. However, a limitation of the life event inventory is inter-categorical variability  
29  
30 and recall bias in the appraisal of the stressful life event [32]. In a cross-sectional study,  
31  
32 interpreting the causal relationship between stress and the health-related functional  
33  
34 outcomes can be uncertain. Further longitudinal studies are required.  
35  
36

37  
38 Studies [33-35] have reported that mental health status, including anxiety and  
39  
40 depressive symptoms, are better predictors of COPD-related quality of life than  
41  
42 pulmonary function. The present study supports this observation and further indicates  
43  
44 that life event stress has a starkly detrimental effect on mental health and quality of life  
45  
46 in patients with COPD. **More studies of the effects of stress management and coping  
47  
48 strategy in psychological interventions in COPD should be investigated in randomized  
49  
50 controlled clinical trials.**

51  
52  
53 **It is increasingly being recognized that the identification of mood and anxiety  
54  
55 disorders, and psychological and psychosocial interventions to improve mood and  
56  
57 reduce anxiety are important for improving patient centered outcomes in COPD patients.**  
58  
59  
60



1  
2  
3 However, in published clinical guidelines such as NICE, where the initial step care  
4 management by practitioners in primary care and general hospital settings includes  
5 low-intensity psychosocial interventions for patients with persistent subthreshold  
6 depressive symptoms or mild to moderate depression, there appears to be little  
7 attention given to identifying stressful life event(s) and supporting COPD patients  
8 experiencing stressful life events to prevent the onset of mood and anxiety disorders. In  
9 particular, group-based peer support, individual guided self-help based on cognitive  
10 behavioural therapy (CBT) principles or computerised CBT to reduce patients'  
11 vulnerability to stress may usefully include objective cognitive appraisal of stress,  
12 problem-solving coping skills, and relaxation therapy to help support COPD patients  
13 experiencing stressful life events.  
14  
15  
16  
17  
18  
19  
20  
21  
22  
23  
24  
25  
26

27 In conclusion, the present study found that life event stress was associated with  
28 more depressive symptoms and worse quality of life in individuals with COPD, much  
29 more than in those without COPD. Further studies should explore the role of cognitive  
30 appraisal of stress, coping resources and psycho-social support in this relationship.  
31  
32  
33  
34  
35  
36  
37  
38  
39  
40  
41  
42  
43  
44  
45  
46  
47  
48  
49  
50  
51  
52  
53  
54  
55  
56  
57  
58  
59  
60

**ACKNOWLEDGEMENTS**

The authors thank the following voluntary welfare organizations for their support of the Singapore Longitudinal Ageing Studies: Geylang East Home for the Aged, Presbyterian Community Services, Thye Hua Kwan Moral Society (Moral Neighbourhood Links), Yuhua Neighbourhood Link, Henderson Senior Citizens' Home, NTUC Eldercare Co-op Ltd, Thong Kheng Seniors Activity Centre (Queenstown Centre) and Redhill Moral Seniors Activity Centre.

The study is supported by a research grant (No. 03/1/21/17/214) from the Biomedical Research Council, Agency for Science, Technology and Research (ASTAR).

**DECLARATION OF INTEREST**

The authors declare that there are no declarations of interest in relation to the current study. The authors are responsible for the writing and the content of this article.

**DATA SHARING STATEMENT**

There is no additional data available.

## References

- 1 **Jemal A**, Ward E, Hao Y, et al. Trends in the leading causes of death in the United States, 1970-2002. *JAMA : the journal of the American Medical Association*. 2005; **294**: 1255-9.
- 2 **Murray CJ**, Lopez AD. Global mortality, disability, and the contribution of risk factors: Global Burden of Disease Study. *Lancet*. 1997; **349**: 1436-42.
- 3 **Zhang MWB**, Ho RCM, Cheung MWL, et al. Prevalence of depressive symptoms in patients with chronic obstructive pulmonary disease: a systematic review, meta-analysis and meta-regression. *General hospital psychiatry*. 2011; **33**: 217-23.
- 4 **Eisner MD**, Blanc PD, Yelin EH, et al. Influence of anxiety on health outcomes in COPD. *Thorax*. 2010; **65**: 229-34.
- 5 **Repetti RL**, Taylor SE, Seeman TE. Risky families: family social environments and the mental and physical health of offspring. *Psychol Bull*. 2002; **128**: 330-66.
- 6 **Marin MF**, Lord C, Andrews J, et al. Chronic stress, cognitive functioning and mental health. *Neurobiol Learn Mem*. 2011; **96**: 583-95.
- 7 **DeVito AJ**. Dyspnea during hospitalizations for acute phase of illness as recalled by patients with chronic obstructive pulmonary disease. *Heart Lung*. 1990; **19**: 186-91.
- 8 **Gurney-Smith B**, Cooper MJ, Wallace LM. Anxiety and Panic in Chronic Obstructive Pulmonary Disease: The Role of Catastrophic Thoughts. *Cognitive Therapy and Research*. 2002; **26**: 143-55.
- 9 **Guelli N**, Verrusio W, Linguanti A, et al. Montelukast therapy and psychological distress in chronic obstructive pulmonary disease (COPD): a preliminary report. *Archives of gerontology and geriatrics*. 2011; **52**: e36-9.
- 10 **Colby JP**, Linsky AS, Straus MA. Social stress and state-to-state differences in smoking and smoking related mortality in the United States. *Soc Sci Med*. 1994; **38**: 373-81.
- 11 **Ng TP**, Broekman BFP, Niti M, et al. Determinants of Successful Aging Using a Multidimensional Definition Among Chinese Elderly in Singapore. *American Journal of Geriatric Psychiatry*. 2009; **17**: 407-16.
- 12 **Niti M**, Ng TP, Kua EH, et al. Depression and chronic medical illnesses in Asian older adults: the role of subjective health and functional status. *Int J Geriatr Psychiatry*. 2007; **22**: 1087-94.
- 13 **Global Initiative for Chronic Obstructive Lung Disease**. Global strategy for the diagnosis, management and prevention of chronic obstructive pulmonary disease. Executive summary. *NHLBI/WHO workshop report*. 2001.
- 14 **Andenaes R**, Moum T, Kalfoss MH, et al. Changes in health status, psychological distress, and quality of life in COPD patients after hospitalization. *Qual Life Res*. 2006; **15**: 249-57.
- 15 **Andenaes R**. Psychological characteristics of patients with chronic obstructive pulmonary disease: a review. *J Psychosom Res*. 2005; **59**: 427-8.
- 16 **Yesavage JA**, Brink TL, Rose TL, et al. Development and validation of a geriatric depression screening scale: a preliminary report. *Journal of psychiatric research*. 1982; **17**: 37-49.
- 17 **Nyunt MSZ**, Fones C, Niti M, et al. Criterion-based validity and reliability of the Geriatric Depression Screening Scale (GDS-15) in a large validation sample of community-living Asian older adults. *Aging Ment Health*. 2009; **13**: 376-82.
- 18 **Soh KC**, Kumar R, Niti M, et al. Subsyndromal depression in old age: clinical significance and impact. *Int Psychogeriatr*. 2008; **20**: 188-200.
- 19 **Broadbent DE**, Cooper PF, FitzGerald P, et al. The Cognitive Failures Questionnaire (CFQ) and its correlates. *Br J Clin Psychol*. 1982; **21 (Pt 1)**: 1-16.
- 20 **Folstein MF**, Folstein SE, McHugh PR. "Mini-mental state". A practical method for grading the cognitive state of patients for the clinician. *Journal of psychiatric research*. 1975; **12**: 189-98.
- 21 **Ware JE**, Sherbourne CD. The MOS 36-item short-form health survey (SF-36). I. Conceptual framework and item selection. *Med Care*. 1992; **30**: 473-83.

- 1  
2  
3 22 **Thumboo J, Fong KY, Machin D, et al.** A community-based study of scaling assumptions  
4 and construct validity of the English (UK) and Chinese (HK) SF-36 in Singapore. *Qual Life Res.*  
5 2001; **10**: 175-88.
- 6 23 **Weinberg SL, Abramowitz SK.** *Data Analysis for the Behavioral Sciences Using SPSS.* New  
7 York: Cambridge University Press, 2002; 392-7.
- 8 24 **Andenaes R, Kalfoss MH, Wahl AK.** Coping and psychological distress in hospitalized  
9 patients with chronic obstructive pulmonary disease. *Heart Lung.* 2006; **35**: 46-57.
- 10 25 **Grant I, Heaton RK, McSweeney AJ, et al.** Neuropsychologic findings in hypoxemic chronic  
11 obstructive pulmonary disease. *Archives of internal medicine.* 1982; **142**: 1470-6.
- 12 26 **Fix AJ, Golden CJ, Daughton D, et al.** Neuropsychological deficits among patients with  
13 chronic obstructive pulmonary disease. *The International journal of neuroscience.* 1982; **16**: 99-  
14 105.
- 15 27 **Klein M, Gauggel S, Sachs G, et al.** Impact of chronic obstructive pulmonary disease  
16 (COPD) on attention functions. *Respiratory medicine.* 2010; **104**: 52-60.
- 17 28 **Cerhan JR, Folsom AR, Mortimer JA, et al.** Correlates of cognitive function in middle-  
18 aged adults. Atherosclerosis Risk in Communities (ARIC) Study Investigators. *Gerontology.* 1998;  
19 **44**: 95-105.
- 20 29 **Anstey KJ, Windsor TD, Jorm AF, et al.** Association of pulmonary function with cognitive  
21 performance in early, middle and late adulthood. *Gerontology.* 2004; **50**: 230-4.
- 22 30 **Sachdev PS, Anstey KJ, Parslow RA, et al.** Pulmonary function, cognitive impairment  
23 and brain atrophy in a middle-aged community sample. *Dementia and geriatric cognitive*  
24 *disorders.* 2006; **21**: 300-8.
- 25 31 **Min JY, Min KB, Paek D, et al.** The association between neurobehavioral performance  
26 and lung function. *Neurotoxicology.* 2007; **28**: 441-4.
- 27 32 **Dohrenwend BP.** Inventorying stressful life events as risk factors for psychopathology:  
28 Toward resolution of the problem of intracategory variability. *Psychological bulletin.* 2006; **132**:  
29 477-95.
- 30 33 **McSweeney AJ, Grant I, Heaton RK, et al.** Life quality of patients with chronic obstructive  
31 pulmonary disease. *Arch Intern Med.* 1982; **142**: 473-8.
- 32 34 **Kim HF, Kunik ME, Molinari VA, et al.** Functional impairment in COPD patients: the  
33 impact of anxiety and depression. *Psychosomatics.* 2000; **41**: 465-71.
- 34 35 **Cully JA, Graham DP, Stanley MA, et al.** Quality of life in patients with chronic obstructive  
35 pulmonary disease and comorbid anxiety or depression. *Psychosomatics.* 2006; **47**: 312-9.
- 36  
37  
38  
39  
40  
41  
42  
43  
44  
45  
46  
47  
48  
49  
50  
51  
52  
53  
54  
55  
56  
57  
58  
59  
60
